# Supplementary material for: Non-NAD-Like poly(ADP-Ribose) Polymerase-1 Inhibitors effectively Eliminate Cancer in vivo
Source: PubMed Central journal article supplement — eBioMedicine. 2016 Oct 4;13:90–8. doi: 10.1016/j.ebiom.2016.10.001 (PMC5264309; doi:10.1016/j.ebiom.2016.10.001), 2016-10-04
Supplement: mmc2.pdf [file mmc2.pdf]

**Supplemental Table 1.** NAD and known small molecule PARP-1 inhibitors. Column # 1 - formal and popular names for each small molecule; column # 2 - CID number; column # 3 - formulas in SMILES format; column #4 - skeletal formulas of each compound. Row 1 shows NAD; rows 2 - 24 show known PARP-1 inhibitors; row 25 shows Pyrrolocarbazole, derivatives of which have strong similarity to known PARP-1 inhibitors; rows 26 - 27 include minor groove binding molecules that have been shown to inhibit DNA-dependent PARP-1 activation [16].

|    | Name                        | CID      | SMILES                                                                                                   |  |
|----|-----------------------------|----------|----------------------------------------------------------------------------------------------------------|--|
| 1  | NAD                         | 5893     | <chem>C1=CC(=C[N+](=C1)C2C(C(C(O2)COP(=O)(O)OP(=O)(O)OCC3C(C(C(O3)N4C=NC5=C4N=CN=C5N)O)O)O)C(=O)N</chem> |  |
| 2  | Nicotinamide                | 936      | <chem>C1=CC(=CN=C1)C(=O)N</chem>                                                                         |  |
| 3  | 3AB/ PARP inhib. I          | 1645     | <chem>C1=CC(=CC(=C1)N)C(=O)N</chem>                                                                      |  |
| 4  | PARP Inhibitor II, INH2BP   | 72356    | <chem>C1=CC(=O)OC2=C1C(=C(C=C2)N)I</chem>                                                                |  |
| 5  | PARP Inhibitor III, DPQ     | 3164     | <chem>C1CCN(CC1)CCCCOC2CNC(=O)C3=CC=CC=C23</chem>                                                        |  |
| 6  | PARP Inhibitor IV, IQD      | 1340     | <chem>C1=CC2=C(C=CNC2=O)C(=C1)O</chem>                                                                   |  |
| 7  | 4-ANI/ PARP inhib. V        | 1720     | <chem>C1=CC2=C(C=CC3=C2C(=C1)C(=O)NC3=O)N</chem>                                                         |  |
| 8  | PARP Inhibitor VI, NU1025   | 63306    | <chem>CC1=NC(=O)C2=C(N1)C(=CC=C2)O</chem>                                                                |  |
| 9  | 6(5H)-Phenanthridinone      | 1853     | <chem>C1=CC=C2C(=C1)C3=C(C=CC=C3NC2=O</chem>                                                             |  |
| 10 | PARP Inhibitor VIII, PJ34   | 16760621 | <chem>CN(C)CC(=O)NC1=CC2=C(C=C1)NC(=O)C3=CC=CC=C32.Cl</chem>                                             |  |
| 11 | PARP Inhibitor IX, EB-47    | 16760406 | <chem>C1CN(CCN1CC(=O)NC2=CC=CC3=C2CNC3=O)C(=O)C4C(C(C(O4)N5C=NC6=C5N=CN=C6N)O)O.O.Cl.Cl</chem>           |  |
| 12 | PARP inhibitor X, TIQ-A     | 9899130  | <chem>C1=CC=C2C(=C1)C3=C(C=NC2=O)SC=C3</chem>                                                            |  |
| 13 | PARP Inhibitor XI, DR2313   | 10219702 | <chem>CC1=NC(=O)C2=C(N1)C=CSC2</chem>                                                                    |  |
| 14 | PARP Inhibitor XII          | 57347661 | <chem>CC1=CC=C(C=C1)C2=N(C3=C(C=CC=C3N=C2)C(=O)N</chem>                                                  |  |
| 15 | PARP Inhibitor XV, UPF-1035 | 659976   | <chem>C1=CC=C(C=C1)C(=O)OC2=CC=CC3=C2C=NC3=O</chem>                                                      |  |
| 16 | Olaparib                    | 23725625 | <chem>C1CC1C(=O)N2CCN(CC2)C(=O)C3=C(C=CC(=C3)CC4=NNC(=O)C5=CC=CC=C54)F</chem>                            |  |
| 17 | ABT-888 (Veliparib)         | 11960529 | <chem>CC1(CCCN1)C2=NC3=C(C=CC=C3N2)C(=O)N</chem>                                                         |  |

|    |                                                              |          |                                                                                    |  |
|----|--------------------------------------------------------------|----------|------------------------------------------------------------------------------------|--|
| 18 | Rucaparib                                                    | 9931954  | <chem>CNCC1=CC=C(C=C1)C2=C3CCNC(=O)C4=CC(=CC(=C34)N2)F</chem>                      |  |
| 19 | BSI-201 Iniparib                                             | 9796068  | <chem>C1=CC(=C(C=C1C(=O)N)[N+](=O)[O-])I</chem>                                    |  |
| 20 | AG14361                                                      | 9840076  | <chem>CN(C)CC1=CC=C(C=C1)C2=NC3=CC=CC4=C3N2CCNC4=O</chem>                          |  |
| 21 | A-966492                                                     | 16665853 | <chem>C1CC(NC1)C2=CC(=C(C=C2)C3=NC4=C(C=CC=C4N3)C(=O)N)F</chem>                    |  |
| 22 | MK-4827                                                      | 24958200 | <chem>C1CC(NC1)C2=CC(=C(C=C2)N3C=C4C=CC=C(C4=N3)C(=O)N</chem>                      |  |
| 23 | BYK49187                                                     | 15285131 | <chem>CC1=C(N=CN1)C2CCN(CC2)C3=NC4=CC=CC5=C4N3CCCC5=O</chem>                       |  |
| 24 | BYK20370                                                     | 25113763 | <chem>CC1=C(N2C=C(C=C(C2=N1)O)Cl)C</chem>                                          |  |
| 25 | Pyrrolocarbazole derivative (only similar to published inh.) | 58890072 | <chem>C1CC2=C(CCC1=O)C3=C(C4C2NC5=CC=CC=C45)C(=O)NC3=O</chem>                      |  |
| 26 | Diminazene                                                   | 2354     | <chem>C1=CC(=CC=C1C(=N)N)NN=NC2=CC=C(C=C2)C(=N)N</chem>                            |  |
| 27 | Hoechst 33342                                                | 1464     | <chem>CCOC1=CC=C(C=C1)C2=NC3=C(N2)C=C(C=C3)C4=NC5=C(N4)C=C(C=C5)N6CCN(CC6)C</chem> |  |

**Supplemental Table 2.** The results of pilot screen of ICCB known bioactivities. Column # 1 shows the values of PARP-1 inhibition; column # 2 – the plate number and the position on the plate; column # 3 – name of each small molecule; column # 4 – known biological activity.

| <b>Value</b> | <b>Position</b> | <b>NAME</b>                                         |                                                |
|--------------|-----------------|-----------------------------------------------------|------------------------------------------------|
| 1.22         | 2-H9            | A-23187                                             | Calcium ionophore                              |
| 2.34         | 3-C2            | Loperamide                                          | Calcium channels                               |
| 2.01         | 3-D6            | PCO-400                                             | Potassium channels                             |
| 2.07         | 4-A4            | b-Lapachone                                         | topoisomerase 1 inhibitor                      |
| 2.06         | 4-A5            | Parthenolide                                        | IkappaB kinase inhibitor                       |
| 1.89         | 4-A9            | Cycloheximide-N-ethylethanoate                      | FKBP12 inhibitor                               |
| 0.05         | 4-B2            | Ebselen                                             | glutathione peroxidase mimetic                 |
| 1.28         | 4-C7            | AG213 (Tyrphostin 47)                               | EGF-R tyrosine kinase inhibitor                |
| 0.05         | 4-D6            | Amino-1,8-naphthalimide [4-Amino-1,8-naphthalimide] | PARP inhibitor                                 |
| 2.03         | 4-H11           | Cytochalasin B                                      | F actin capper                                 |
| 2.00         | 5-A6            | Decoyinine                                          | lowers GTP levels                              |
| 2.01         | 5-A9            | Dexamethasone                                       | corticosteroid                                 |
| 0.50         | 5-B3            | 6,7-ADTN HBr                                        | Dopamine agonist                               |
| 0.20         | 5-B5            | Diphenyleneiodonium Cl                              | flavoprotein inhibitor                         |
| 0.05         | 5-D6            | H9                                                  | kinase inhibitor                               |
| 0.94         | 5-E8            | IBMX                                                | PDE inhibitor (broad spec), adenosineR agonist |
| 0.69         | 6-A9            | PD 98059                                            | MEK inhibitor                                  |
| 0.05         | 6-B2            | Phenanthridinone [6(5H)-Phenanthridinone]           | PARP inhibitor                                 |
| 0.18         | 6-B10           | Propidium iodide                                    | DNA intercalator                               |
| 0.18         | 6-C5            | Quercetin                                           | kinase inhibitor (plus other)                  |
| 1.25         | 6-D6            | Indirubin                                           | GSK-3beta inhibitor                            |
| 1.43         | 6-D11           | Piceatannol                                         | Syk inhibitor                                  |
| 1.90         | 6-H11           | Wiskostatin                                         | N-WASP inhibitor                               |
| 0.18         | 4-D7            | 3AB                                                 | PARP inhibitor                                 |

**Supplemental Table 3-1 -- 3-11.** Structural classification of 639 compounds identified as PARP-1 inhibitors by the H4-based screen. Small molecules were classified based on the presence of specific structural cores: **S3-1** – Nicotinamide/Benzamide; **S3-2** - PARP Inhibitor II; **S3-3** - Adenine/Caffeine; **S3-4** - Benzimidazole; **S3-5** - Benzothiazole; **S3-6** - Indole; **S3-7** - Benzofurazan; **S3-8** - 5-imino-5,6-dihydro-7H-[1,3,4]thiadiazolo[3,2-a]pyrimidin-7-one; **S3-9** - Quinoline; **S3-10** - Naphtalene; **S3-11** contains 345 new PARP-1 inhibitors without obvious structural core similarities to other groups. Column # 1 lists the ID number of each small molecule according to the ChemDiv company catalogue; column # 2 – the number of plate in the collection; column # 3 – the position on the plate; column # 4 – skeletal structure of the molecule; column # 5 and 6 – similarity to known PARP-1 inhibitor.

## S3-1 – Nicotinamide/Benzamide

|    | 1         | 2   | 3   | 4                                                                                                                   | 5                                                  | 6                                                    |
|----|-----------|-----|-----|---------------------------------------------------------------------------------------------------------------------|----------------------------------------------------|------------------------------------------------------|
| 1  | 1546-0014 | 001 | C07 | 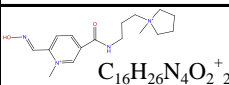<br><chem>C16H26N4O2+</chem>       | Nicotinamide                                       |                                                      |
| 2  | 2451-0081 | 002 | C02 | <br><chem>C15H10BrN3O5</chem>      | Benzamide/<br>Indole/ MGB                          |                                                      |
| 3  | 5556-0387 | 003 | F09 | <br><chem>C15H10N6O5</chem>        | Nicotinamide                                       |                                                      |
| 4  | 1719-1296 | 001 | G08 | <br><chem>C13H8BrN3O2S</chem>      | Substituted<br>Amino-<br>benzamide/<br>Indole/ MGB |                                                      |
| 5  | 1719-1336 | 001 | H08 | <br><chem>C15H13N3OS</chem>        | Substituted<br>Aminobenzami<br>de/ Indole/<br>MGB  |                                                      |
| 6  | G786-1566 | 008 | D06 | <br><chem>C14H13N3O4S2</chem>      | Substituted<br>Benzamide?/<br>Benzothiazole        |                                                      |
| 7  | 4607-0208 | 002 | H09 | <br><chem>C14H14F3N3O2</chem>      | Nicotinamide                                       |                                                      |
| 8  | 4719-0299 | 002 | H10 | <br><chem>C13H15N3O2S</chem>      | Benzamide like                                     |                                                      |
| 9  | 4896-3465 | 003 | G02 | <br><chem>C18H14BrClN4O3S</chem> | Benzamide?                                         |                                                      |
| 10 | 4896-4210 | 003 | A03 | <br><chem>C22H16FN5OS</chem>     | Nicotinamide?                                      |                                                      |
| 11 | 6220-0542 | 004 | H10 | <br><chem>C21H23N5OS</chem>      | Benzamide                                          |                                                      |
| 12 | C722-0493 | 007 | D08 | <br><chem>C18H28N2O3</chem>      | Substituted<br>Benzamide?                          |                                                      |
| 13 | K805-0558 | 008 | F10 | <br><chem>C27H28N2O6</chem>      | Benzamide?                                         |                                                      |
| 14 | 1203-0064 | 001 | E04 | <br><chem>C10H8N2O3S</chem>      | Benzamide                                          | 493800 <i>PARP</i><br><i>Inhibitor</i> VI, NU1025    |
| 15 | 3606-0037 | 002 | C04 | <br><chem>C9H6BrN3O3</chem>      | Benzamide                                          | 493800 <i>PARP</i><br><i>Inhibitor</i> VI, NU1025    |
| 16 | 3643-1604 | 002 | H04 | <br><chem>C17H9Cl2N3O</chem>     | Benzamide                                          | 493800 <i>PARP</i><br><i>Inhibitor</i> VI,<br>NU1025 |
| 17 | 3643-1638 | 002 | A05 | <br><chem>C17H9Br2N3O2</chem>    | Benzamide                                          | 493800 <i>PARP</i><br><i>Inhibitor</i> VI,<br>NU1025 |

|    |           |     |     |                                                                                                                                                                     |                                                    |                                             |
|----|-----------|-----|-----|---------------------------------------------------------------------------------------------------------------------------------------------------------------------|----------------------------------------------------|---------------------------------------------|
| 18 | 3643-1655 | 002 | B05 | 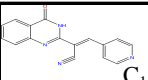<br>C <sub>16</sub> H <sub>10</sub> N <sub>4</sub> O                               | Benzamide                                          | 493800 <i>PARP Inhibitor VI</i> ,<br>NU1025 |
| 19 | 4142-0922 | 002 | G07 | <br>C <sub>16</sub> H <sub>23</sub> ClN <sub>2</sub> O <sub>2</sub>                | Substituted<br>Amino-<br>benzamide                 | <i>PARP Inhibitor IX</i> ,<br>EB47          |
| 20 | 4243-0150 | 002 | G08 | <br>C <sub>9</sub> H <sub>8</sub> ClN <sub>5</sub> O                               | Benzamide                                          | 493800 <i>PARP Inhibitor VI</i> ,<br>NU1025 |
| 21 | 4493-0928 | 002 | C09 | <br>C <sub>14</sub> H <sub>14</sub> N <sub>2</sub> O <sub>2</sub>                  | Substituted<br>Aminobenzami<br>ne/ Pyridine        | <i>PARP Inhibitor IX</i> ,<br>EB47          |
| 22 | 4493-0929 | 002 | D09 | <br>C <sub>18</sub> H <sub>16</sub> N <sub>2</sub> O <sub>2</sub>                  | Substituted<br>Amino-<br>benzamide/<br>Quinoxaline | <i>PARP Inhibitor IX</i> ,<br>EB47          |
| 23 | 4994-0433 | 003 | H03 | <br>C <sub>15</sub> H <sub>12</sub> N <sub>4</sub> O <sub>3</sub>                  | Benzamide                                          | Olaparib (AZD2281)                          |
| 24 | 4994-0542 | 003 | A04 | <br>C <sub>16</sub> H <sub>13</sub> N <sub>5</sub> O <sub>2</sub>                  | Benzamide                                          | Olaparib (AZD2281)                          |
| 25 | 5742-0594 | 004 | D02 | <br>C <sub>13</sub> H <sub>14</sub> N <sub>4</sub> OS                              | Benzamide                                          | 493800 <i>PARP Inhibitor VI</i> ,<br>NU1025 |
| 26 | 5947-0056 | 004 | B05 | <br>C <sub>8</sub> H <sub>9</sub> N <sub>3</sub> O                                 | Nicotinamide                                       | <i>PARP Inhibitor IX</i> ,<br>EB47          |
| 27 | 6228-0215 | 004 | B11 | <br>C <sub>16</sub> H <sub>27</sub> N <sub>2</sub> O <sub>2</sub> +               | Benzamide?                                         | <i>PARP Inhibitor IX</i> ,<br>EB47          |
| 28 | 6228-0595 | 005 | E02 | <br>C <sub>16</sub> H <sub>23</sub> N <sub>2</sub> O <sub>2</sub> +              | Substituted<br>Benzamide?                          | <i>PARP Inhibitor IX</i> ,<br>EB47          |
| 29 | 6359-0109 | 005 | H06 | <br>C <sub>16</sub> H <sub>18</sub> N <sub>4</sub> O <sub>2</sub> S <sub>3</sub> | Benzamide                                          | 493800 <i>PARP Inhibitor VI</i> ,<br>NU1025 |
| 30 | 7832-0165 | 006 | A06 | <br>C <sub>12</sub> H <sub>11</sub> N <sub>5</sub> OS                            | Benzamide                                          | Olaparib (AZD2281)                          |
| 31 | C200-2670 | 006 | F08 | <br>C <sub>10</sub> H <sub>15</sub> N <sub>3</sub> O <sub>2</sub> S              | Substituted<br>Benzamide?                          | 493800 <i>PARP Inhibitor VI</i> ,<br>NU1025 |
| 32 | C612-0960 | 007 | G06 | <br>C <sub>18</sub> H <sub>13</sub> F <sub>2</sub> N <sub>3</sub> OS             | Nicotinamide                                       | <i>PARP Inhibitor IX</i> ,<br>EB47          |
| 33 | D163-0928 | 007 | B10 | <br>C <sub>19</sub> H <sub>17</sub> N <sub>3</sub> O <sub>2</sub>                | Benzamide                                          | 493800 <i>PARP Inhibitor VI</i> ,<br>NU1025 |
| 34 | D163-0929 | 007 | C10 | <br>C <sub>20</sub> H <sub>19</sub> N <sub>3</sub> O <sub>2</sub>                | Benzamide                                          | 493800 <i>PARP Inhibitor VI</i> ,<br>NU1026 |
| 35 | D216-0576 | 007 | E10 | <br>C <sub>14</sub> H <sub>11</sub> N <sub>3</sub> O <sub>2</sub> S              | Benzamide?                                         | Olaparib (AZD2281)                          |
| 36 | D216-0577 | 007 | F10 | <br>C <sub>14</sub> H <sub>11</sub> N <sub>3</sub> O <sub>3</sub>                | Benzamide?                                         | Olaparib (AZD2281)                          |
| 37 | D271-0001 | 007 | H10 | <br>C <sub>14</sub> H <sub>13</sub> N <sub>3</sub> O <sub>4</sub> S              | Nicotin-amide?                                     | 493800 <i>PARP Inhibitor VI</i> ,<br>NU1026 |



|    |                    |     |     |                                                                                                                                                                     |                           |                                             |
|----|--------------------|-----|-----|---------------------------------------------------------------------------------------------------------------------------------------------------------------------|---------------------------|---------------------------------------------|
| 38 | D271-0003          | 007 | A11 | 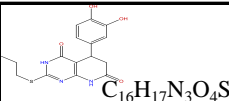<br>C <sub>16</sub> H <sub>17</sub> N <sub>3</sub> O <sub>4</sub> S                | Nicotin-amide?            | 493800 <i>PARP Inhibitor VI</i> ,<br>NU1026 |
| 39 | D271-0004          | 007 | B11 | <br>C <sub>16</sub> H <sub>15</sub> N <sub>3</sub> O <sub>4</sub> S                | Nicotin-amide?            | 493800 <i>PARP Inhibitor VI</i> ,<br>NU1026 |
| 40 | D271-0394          | 007 | C11 | <br>C <sub>22</sub> H <sub>21</sub> N <sub>3</sub> O <sub>4</sub> S                | Nicotin-amide?            | 493800 <i>PARP Inhibitor VI</i> ,<br>NU1026 |
| 41 | E679-0352          | 008 | E03 | <br>C <sub>15</sub> H <sub>20</sub> N <sub>4</sub> O <sub>2</sub>                  | Benzamide                 | 300270 <i>PARP Inhibitor III</i> , DPQ      |
| 42 | G786-2274          | 008 | E06 | <br>C <sub>16</sub> H <sub>19</sub> N <sub>3</sub> O <sub>2</sub>                  | Benzamide                 | Olaparib (AZD2281)                          |
| 43 | G786-2313          | 008 | F06 | <br>C <sub>14</sub> H <sub>11</sub> N <sub>3</sub> O <sub>3</sub>                  | Benzamide                 | Olaparib (AZD2281)                          |
| 44 | K284-7470          | 008 | F08 | <br>C <sub>16</sub> H <sub>23</sub> N <sub>3</sub> O <sub>3</sub> S                | Benzamide                 | 493800 <i>PARP Inhibitor VI</i> ,<br>NU1025 |
| 45 | K288-0565          | 008 | G08 | <br>C <sub>23</sub> H <sub>23</sub> N <sub>3</sub> O <sub>4</sub> S                | Benzamide                 | 493800 <i>PARP Inhibitor VI</i> ,<br>NU1025 |
| 46 | K292-1481          | 008 | H08 | <br>C <sub>16</sub> H <sub>21</sub> N <sub>3</sub> O <sub>2</sub> S <sub>2</sub>   | Substituted<br>Benzamide? | 528819 <i>PARP Inhibitor XI</i> ,<br>DR2313 |
| 47 | K292-1552          | 008 | A09 | <br>C <sub>15</sub> H <sub>20</sub> N <sub>4</sub> O <sub>3</sub> S <sub>2</sub>  | Substituted<br>Benzamide? | 528819 <i>PARP Inhibitor XI</i> ,<br>DR2313 |
| 48 | K292-1560          | 008 | B09 | <br>C <sub>12</sub> H <sub>16</sub> N <sub>4</sub> O <sub>2</sub> S <sub>2</sub> | Substituted<br>Benzamide? | 528819 <i>PARP Inhibitor XI</i> ,<br>DR2313 |
| 49 | K807-1169          | 008 | G10 | <br>C <sub>24</sub> H <sub>23</sub> N <sub>5</sub> O <sub>4</sub>                | Substituted<br>Benzamide? | <i>PARP Inhibitor IX</i> ,<br>EB47          |
| 50 | P38803_AL<br>DRICH | 008 | F11 | <br>C <sub>8</sub> H <sub>6</sub> N <sub>2</sub> O <sub>2</sub>                  | Benzamide                 | Olaparib (AZD2281)                          |
| 51 | 2248-4802          | 001 | E11 | <br>C <sub>12</sub> H <sub>6</sub> N <sub>2</sub> O <sub>4</sub>                 | Benzamide                 | 4ANI, <i>PARP inhib. V</i>                  |
| 52 | N1658_AL<br>DRICH  | 001 | D11 | <br>C <sub>12</sub> H <sub>7</sub> NO <sub>2</sub>                               | Benzamide                 | 4ANI, <i>PARP inhib. V</i>                  |
| 53 | 4159-0181          | 002 | B08 | <br>C <sub>15</sub> H <sub>12</sub> N <sub>4</sub> OS <sub>2</sub>               | Substituted<br>Amino-     | Phenanthridinone                            |
| 54 | 5282-0578          | 003 | H06 | <br>C <sub>16</sub> H <sub>17</sub> N <sub>5</sub> O <sub>2</sub>                | Nicotinamide              |                                             |
| 55 | 5282-0891          | 003 | A07 | <br>C <sub>17</sub> H <sub>17</sub> N <sub>5</sub> O <sub>2</sub>                | Nicotinamide              |                                             |
| 56 | G290-1019          | 008 | C06 | <br>C <sub>19</sub> H <sub>19</sub> N <sub>3</sub> O <sub>3</sub> S              | Benzamide                 | Phenanthridinone                            |
| 57 | 4711-0020          | 002 | D10 | <br>C <sub>20</sub> H <sub>19</sub> N <sub>3</sub> O                             | Benzamide                 | Olaparib (AZD2281)                          |

|    |           |     |     |                                                                                                                                                                      |                        |                                  |
|----|-----------|-----|-----|----------------------------------------------------------------------------------------------------------------------------------------------------------------------|------------------------|----------------------------------|
| 58 | 4711-0033 | 002 | E10 | 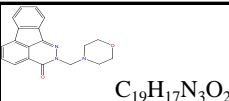<br>C <sub>19</sub> H <sub>17</sub> N <sub>3</sub> O <sub>2</sub>                   | Benzamide              | Olaparib (AZD2281)               |
| 59 | 5966-0051 | 004 | E05 | <br>C <sub>19</sub> H <sub>19</sub> N <sub>3</sub> O                                | Benzamide              | Olaparib (AZD2281)               |
| 60 | 4934-0319 | 003 | F03 | <br>C <sub>21</sub> H <sub>15</sub> N <sub>3</sub> O <sub>3</sub>                   | Nicotinamide           | 528824 PARP Inhibitor XIV        |
| 61 | 5107-0060 | 003 | H04 | <br>C <sub>12</sub> H <sub>9</sub> N <sub>3</sub> O <sub>2</sub>                    | Nicotinamide           | PARP Inhibitor IX, EB47          |
| 62 | 5107-0060 | 003 | H04 | <br>C <sub>12</sub> H <sub>9</sub> N <sub>3</sub> O <sub>2</sub>                    | Nicotinamide           | PARP Inhibitor IX, EB47          |
| 63 | 5140-0200 | 003 | A05 | <br>C <sub>22</sub> H <sub>25</sub> N <sub>5</sub> O <sub>2</sub> S                 | Substituted Benzamide? | 493800 PARP Inhibitor VI, NU1025 |
| 64 | 5218-3270 | 003 | F05 | <br>C <sub>25</sub> H <sub>26</sub> N <sub>2</sub> O <sub>2</sub> S                 | Benzamide?             | 493800 PARP Inhibitor VI, NU1025 |
| 65 | 5585-0391 | 003 | H09 | <br>C <sub>15</sub> H <sub>14</sub> N <sub>4</sub> OS                               | Substituted Benzamide? | 493800 PARP Inhibitor VI, NU1025 |
| 66 | 5586-2133 | 003 | A10 | <br>C <sub>17</sub> H <sub>14</sub> N <sub>4</sub> O <sub>2</sub> S <sub>2</sub>    | Substituted Benzamide? | 528819 PARP Inhibitor XI, DR2313 |
| 67 | 6228-0480 | 005 | A02 | <br>C <sub>20</sub> H <sub>33</sub> N <sub>2</sub> O <sub>2</sub> +                 | Substituted Benzamide? | PARP Inhibitor IX, EB47          |
| 68 | C200-3022 | 006 | G08 | <br>C <sub>17</sub> H <sub>13</sub> FN <sub>2</sub> O <sub>2</sub> S              | Substituted Benzamide? |                                  |
| 69 | C200-3045 | 006 | H08 | <br>C <sub>18</sub> H <sub>14</sub> N <sub>4</sub> O <sub>5</sub> S               | Benzamide              | 493800 PARP Inhibitor VI, NU1025 |
| 70 | C362-0173 | 007 | C03 | <br>C <sub>18</sub> H <sub>11</sub> Cl <sub>2</sub> N <sub>3</sub> O <sub>2</sub> | Nicotinamide           | 493800 PARP Inhibitor VI, NU1025 |
| 71 | K263-0536 | 008 | D08 | <br>C <sub>19</sub> H <sub>22</sub> N <sub>4</sub> O <sub>2</sub> S <sub>2</sub>  | Substituted Benzamide? | 528819 PARP Inhibitor XI, DR2313 |
| 72 | K284-5080 | 008 | E08 | <br>C <sub>15</sub> H <sub>19</sub> N <sub>3</sub> O <sub>3</sub> S               | Benzamide              | 493800 PARP Inhibitor VI, NU1025 |
| 73 | E596-0112 | 008 | G02 | <br>C <sub>21</sub> H <sub>22</sub> N <sub>6</sub> O <sub>4</sub> S               | Substituted Benzamide? | Phenanthridinone                 |
| 74 | E616-0843 | 008 | H02 | <br>C <sub>22</sub> H <sub>35</sub> N <sub>3</sub> O <sub>4</sub>                 | Substituted Benzamide? |                                  |
| 75 | E616-1041 | 008 | A03 | <br>C <sub>18</sub> H <sub>22</sub> N <sub>2</sub> O <sub>5</sub> S               | Substituted Benzamide? |                                  |
| 76 | E616-1156 | 008 | B03 | <br>C <sub>23</sub> H <sub>37</sub> N <sub>3</sub> O <sub>5</sub>                 | Substituted Benzamide? |                                  |

## S3-2 - PARP Inhibitor II

|    | 1         | 2   | 3   | 4                                                                               | 5                                                  |
|----|-----------|-----|-----|---------------------------------------------------------------------------------|----------------------------------------------------|
| 1  | 1080-0356 | 001 | E03 | <br>C <sub>23</sub> H <sub>14</sub> N <sub>2</sub> O <sub>3</sub> S             | 407850 <i>PARP Inhibitor II, INH<sub>2</sub>BP</i> |
| 2  | 1440-2871 | 001 | D06 | <br>C <sub>18</sub> H <sub>11</sub> BrN <sub>2</sub> O <sub>4</sub>             | 407850 <i>PARP Inhibitor II, INH<sub>2</sub>BP</i> |
| 3  | 1440-2880 | 001 | E06 | <br>C <sub>18</sub> H <sub>11</sub> N <sub>3</sub> O <sub>6</sub>               | 407850 <i>PARP Inhibitor II, INH<sub>2</sub>BP</i> |
| 4  | 1615-0026 | 001 | E07 | <br>C <sub>20</sub> H <sub>12</sub> O <sub>3</sub>                              | 407850 <i>PARP Inhibitor II, INH<sub>2</sub>BP</i> |
| 5  | 4789-3425 | 002 | C11 | <br>C <sub>23</sub> H <sub>22</sub> O <sub>6</sub>                              | 407850 <i>PARP Inhibitor II, INH<sub>2</sub>BP</i> |
| 6  |           | 004 | C05 | <br>C <sub>12</sub> H <sub>10</sub> N <sub>2</sub> O <sub>3</sub>               | 407850 <i>PARP Inhibitor II, INH<sub>2</sub>BP</i> |
| 7  | 6944-0004 | 005 | F08 | <br>C <sub>25</sub> H <sub>24</sub> N <sub>2</sub> O <sub>5</sub>               | 407850 <i>PARP Inhibitor II, INH<sub>2</sub>BP</i> |
| 8  | 6944-0066 | 005 | H08 | <br>C <sub>15</sub> H <sub>12</sub> O <sub>5</sub>                              | 407850 <i>PARP Inhibitor II, INH<sub>2</sub>BP</i> |
| 9  | 6944-0105 | 005 | A09 | <br>C <sub>25</sub> H <sub>22</sub> N <sub>2</sub> O <sub>4</sub>               | 407850 <i>PARP Inhibitor II, INH<sub>2</sub>BP</i> |
| 10 | 6944-0110 | 005 | B09 | <br>C <sub>19</sub> H <sub>22</sub> O <sub>3</sub>                              | 407850 <i>PARP Inhibitor II, INH<sub>2</sub>BP</i> |
| 11 | 6944-0126 | 005 | D09 | <br>C <sub>22</sub> H <sub>24</sub> N <sub>4</sub> O <sub>4</sub>               | 407850 <i>PARP Inhibitor II, INH<sub>2</sub>BP</i> |
| 12 | 6944-0140 | 005 | E09 | <br>C <sub>15</sub> H <sub>12</sub> ClNO <sub>4</sub>                           | 407850 <i>PARP Inhibitor II, INH<sub>2</sub>BP</i> |
| 13 | C301-4598 | 007 | A02 | <br>C <sub>18</sub> H <sub>14</sub> FN <sub>3</sub> O <sub>4</sub> S            | 407850 <i>PARP Inhibitor II, INH<sub>2</sub>BP</i> |
| 14 | C301-6438 | 007 | C02 | <br>C <sub>11</sub> H <sub>8</sub> N <sub>2</sub> O <sub>2</sub> S              | 407850 <i>PARP Inhibitor II, INH<sub>2</sub>BP</i> |
| 15 | C566-0094 | 007 | C06 | <br>C <sub>18</sub> H <sub>14</sub> Br <sub>2</sub> O <sub>4</sub> S            | 407850 <i>PARP Inhibitor II, INH<sub>2</sub>BP</i> |
| 16 | C566-0138 | 007 | D06 | <br>C <sub>15</sub> H <sub>7</sub> Br <sub>2</sub> ClO <sub>4</sub> S           | 407850 <i>PARP Inhibitor II, INH<sub>2</sub>BP</i> |
| 17 | 5591-1932 | 003 | E10 | <br>C <sub>13</sub> H <sub>8</sub> N <sub>2</sub> O <sub>6</sub> S <sub>2</sub> | 407850 <i>PARP Inhibitor II, INH<sub>2</sub>BP</i> |

|    |           |     |     |                                                                                                                                                                       |                                                         |
|----|-----------|-----|-----|-----------------------------------------------------------------------------------------------------------------------------------------------------------------------|---------------------------------------------------------|
| 18 | 6807-0730 | 005 | B08 | 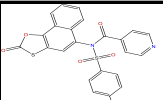<br><chem>C<sub>23</sub>H<sub>13</sub>N<sub>2</sub>O<sub>5</sub>S<sub>2</sub></chem> | 407850 <i>PARP Inhibitor</i><br>II, INH <sub>2</sub> BP |
|----|-----------|-----|-----|-----------------------------------------------------------------------------------------------------------------------------------------------------------------------|---------------------------------------------------------|

## S3-3 - Adenine/Cafeine

|    | 1         | 2   | 3   | 4                                                                                                               | 5         |
|----|-----------|-----|-----|-----------------------------------------------------------------------------------------------------------------|-----------|
| 1  | 1185-1661 | 001 | B04 | <br><chem>C13H19N5O3S</chem>   | Adenine   |
| 2  | 2280-2944 | 001 | F11 | <br><chem>C9H12N4O2S</chem>    | Adenine   |
| 3  | 3601-0852 | 002 | B04 | <br><chem>C10H14N4O2S</chem>   | Adenine   |
| 4  | 3736-0228 | 002 | G05 | <br><chem>C10H12N4O2S</chem>   | Adenine   |
| 5  | 4236-1085 | 002 | F08 | <br><chem>C14H15FN6O2</chem>   | Adenosine |
| 6  | 4244-2141 | 002 | H08 | <br><chem>C15H13ClN4O4S</chem> | Adenosine |
| 7  | 5228-0325 | 003 | H05 | <br><chem>C9H13N5O3</chem>     | Adenine   |
| 8  | 5241-0492 | 003 | E06 | <br><chem>C12H11N5S</chem>     | Adenosine |
| 9  | 5254-2680 | 003 | F06 | <br><chem>C10H14N4O2S</chem>   | Adenine   |
| 10 | 5339-0389 | 003 | F07 | <br><chem>C10H15N5O3</chem>   | Adenine   |
| 11 | 5646-0037 | 003 | F11 | <br><chem>C16H19N5O2S</chem> | Adenosine |
| 12 | 5692-1348 | 003 | H11 | <br><chem>C11H16N4O2S</chem> | Adenine   |
| 13 | 5947-0082 | 004 | D05 | <br><chem>C14H22N4O2S</chem> | Adenine   |
| 14 | 7639-0037 | 006 | D04 | <br><chem>C19H17N5</chem>    | Adenine   |
| 15 | C470-0539 | 007 | G04 | <br><chem>C20H32N6O4</chem>  | Adenine   |

## S3-4 - Benzimidazole

|    | 1         | 2   | 3   | 4                                                                                                              | 5                                                          |
|----|-----------|-----|-----|----------------------------------------------------------------------------------------------------------------|------------------------------------------------------------|
| 1  | 1069-0089 | 001 | D03 | <br>$C_{12}H_{15}N_3S$        | Mercapto-benzimidazole                                     |
| 2  | 2144-0960 | 001 | B11 | <br>$C_9H_{10}N_2S$           | Mercapto-benzimidazole                                     |
| 3  | 2683-0170 | 002 | E02 | <br>$C_{19}H_{22}N_4O_4S$     | Mercapto-benzimidazole                                     |
| 4  | 5055-9162 | 003 | E04 | <br>$C_{16}H_{14}N_2S$        | Mercapto-benzimidazole                                     |
| 5  | 6025-5977 | 004 | H06 | <br>$C_7H_5ClN_2S$            | Mercapto-benzimidazole                                     |
| 6  | 7286-0604 | 006 | E03 | <br>$C_6H_4BrN_3S$            | Mercapto-benzimidazole?                                    |
| 7  | C301-6439 | 007 | D02 | <br>$C_{11}H_8N_4OS$          | Mercapto-benzimidazole?<br><a href="#">Aminobenzimide?</a> |
| 8  | 1247-0021 | 001 | A05 | <br>$C_{19}H_{19}N_3^+$       | Benzimidazole?/<br><a href="#">Quinoline?</a>              |
| 9  | 3945-0101 | 002 | E06 | <br>$C_{16}H_{18}N_3^+$       | Benzimidazole                                              |
| 10 | 4872-0199 | 002 | E11 | <br>$C_{15}H_{10}ClN_5O_5$   | Benzimidazole                                              |
| 11 | 4919-0202 | 003 | E03 | <br>$C_{22}H_{12}N_2O_6S$   | Benzimidazole                                              |
| 12 | 5010-0425 | 003 | D04 | <br>$C_{20}H_{25}N_2O_2^+$  | Benzimidazole                                              |
| 13 | 5103-0523 | 003 | G04 | <br>$C_{19}H_{22}FN_2O_2^+$ | Benzimidazole                                              |
| 14 | 5390-1481 | 003 | C08 | <br>$C_{18}H_{21}N_3O_3$    | Benzimidazole                                              |
| 15 | 6232-0264 | 005 | A04 | <br>$C_{16}H_{13}N_5S$      | Benzimidazole                                              |
| 16 | 6843-3187 | 005 | C08 | <br>$C_{19}H_{15}N_7$       | Benzimidazole                                              |
| 17 | C456-0034 | 007 | D04 | <br>$C_9H_8N_4S$            | Benzimidazole                                              |
| 18 | C456-0050 | 007 | E04 | <br>$C_{15}H_{12}N_4S$      | Benzimidazole                                              |
| 19 | C456-0058 | 007 | F04 | <br>$C_{16}H_{14}N_4OS$     | Benzimidazole                                              |

## S3-5 - Benzothiazole

|    | 1         | 2   | 3   | 4                                                                                                              | 5                          |
|----|-----------|-----|-----|----------------------------------------------------------------------------------------------------------------|----------------------------|
| 1  | 0118-0082 | 001 | C02 | 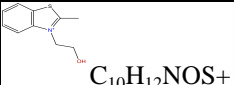<br>$C_{10}H_{12}NOS^+$       | Benzothiazole              |
| 2  | 1365-0041 | 001 | D05 | <br>$C_{13}H_{15}NO_2S$       | Benzothiazole              |
| 3  | 1365-0203 | 001 | G05 | <br>$C_{15}H_{16}N_2O_2S_3$   | Benzothiazole/<br>MGB?     |
| 4  | 1365-0208 | 001 | H05 | <br>$C_{14}H_{14}N_2O_2S_3$   | Benzothiazole              |
| 5  | 1495-0025 | 001 | F06 | <br>$C_{19}H_{21}N_2S^+$      | Benzothiazole              |
| 6  | 1499-0133 | 001 | G06 | <br>$C_{16}H_{16}NOS^+$       | Benzothiazole              |
| 7  | 1822-0349 | 001 | E09 | <br>$C_{13}H_{10}N_4O_2S_3$   | Benzothiazole              |
| 8  | 3167-0429 | 002 | B03 | <br>$C_{14}H_{11}FN_2S_2$     | Benzothiazole              |
| 9  | 3652-0228 | 002 | D05 | <br>$C_{13}H_{16}N_4OS$      | Benzothiazole              |
| 10 | 5591-2869 | 003 | G10 | <br>$C_{23}H_{14}N_2O_3S_3$ | Benzothiazole              |
| 11 | 5830-0010 | 004 | E03 | <br>$C_{21}H_{10}ClN_7S$    | Benzothiazole              |
| 12 | 5984-0397 | 004 | D06 | <br>$C_{19}H_{18}NO_3S^+$   | Benzothiazole              |
| 13 | 6253-0696 | 005 | H05 | <br>$C_{17}H_{19}N_2OS^+$   | Benzothiazole/<br>Pyridine |
| 14 | 6253-0698 | 005 | A06 | <br>$C_{20}H_{21}N_2OS_2^+$ | Benzothiazole              |
| 15 | 6253-0703 | 005 | B06 | <br>$C_{17}H_{19}N_2OS^+$   | Benzothiazole              |
| 16 | 6253-0705 | 005 | C06 | <br>$C_{20}H_{21}N_2OS_2^+$ | Benzothiazole              |
| 17 | 6253-0720 | 005 | D06 | <br>$C_{17}H_{19}N_2OS^+$   | Benzothiazole              |
| 18 | 7165-0066 | 005 | E10 | <br>$C_{21}H_{21}N_2S^+$    | Quinoline<br>Benzothiazole |
| 19 | 7165-0073 | 005 | G10 | <br>$C_{17}H_{19}N_2OS^+$   | Benzothiazole              |
| 20 | 7165-0075 | 005 | H10 | <br>$C_{17}H_{19}N_2S^+$    | Benzothiazole              |

|    |           |     |     |                                                                                                                  |                            |
|----|-----------|-----|-----|------------------------------------------------------------------------------------------------------------------|----------------------------|
| 21 | 7165-0795 | 006 | A02 | 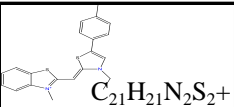<br><chem>C21H21N2S2+</chem>    | Benzothiazole              |
| 22 | 7165-0796 | 006 | B02 | <br><chem>C21H21N2S2+</chem>    | Benzothiazole              |
| 23 | 7165-0807 | 006 | D02 | <br><chem>C21H19N2S+</chem>     | Quinoline<br>Benzothiazole |
| 24 | 7165-0835 | 006 | E02 | <br><chem>C21H21N2S2+</chem>    | Benzothiazole              |
| 25 | 7255-3860 | 006 | D03 | <br><chem>C17H19N5O3S3</chem>   | Benzothiazole              |
| 26 | 7771-0711 | 006 | C05 | <br><chem>C17H17N2S+</chem>     | Benzothiazole              |
| 27 | 7771-0743 | 006 | E05 | <br><chem>C20H19N2S+</chem>     | Quinoline<br>Benzothiazole |
| 28 | 7771-0753 | 006 | F05 | <br><chem>C20H19N2S+</chem>    | Quinoline<br>Benzothiazole |
| 29 | K784-6214 | 008 | B10 | <br><chem>C16H13N5O4S2</chem> | Benzothiazole              |



## S3-6 - Indole

|    | 1         | 2   | 3   | 4                                                                                                                                                                   | 5                  |
|----|-----------|-----|-----|---------------------------------------------------------------------------------------------------------------------------------------------------------------------|--------------------|
| 1  | 1348-0866 | 001 | B05 | 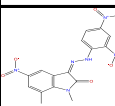<br>C <sub>16</sub> H <sub>12</sub> N <sub>6</sub> O <sub>7</sub>                  | Indole             |
| 2  | 1362-0200 | 001 | C05 | <br>C <sub>19</sub> H <sub>22</sub> N <sup>+</sup>                                 | Indole             |
| 3  | 1439-0176 | 001 | C06 | <br>C <sub>16</sub> H <sub>17</sub> N <sub>3</sub> O                               | Indole             |
| 4  | 1541-0004 | 001 | B07 | <br>C <sub>21</sub> H <sub>25</sub> N <sub>2</sub> <sup>+</sup>                    | Indole             |
| 5  | 1699-1424 | 001 | E08 | <br>C <sub>15</sub> H <sub>8</sub> N <sub>4</sub> O <sub>3</sub>                   | Indole             |
| 6  | 1923-0048 | 001 | H09 | <br>C <sub>19</sub> H <sub>17</sub> IN <sub>2</sub> O <sub>3</sub>                 | Indole             |
| 7  | 1936-2046 | 001 | B10 | <br>C <sub>13</sub> H <sub>10</sub> BrN <sub>5</sub> O <sub>2</sub>                | MGB?               |
| 8  | 2421-0052 | 001 | H11 | <br>C <sub>19</sub> H <sub>20</sub> ClN <sub>2</sub> <sup>+</sup>                  | Indole             |
| 9  | 2421-0298 | 002 | B02 | <br>C <sub>20</sub> H <sub>22</sub> ClN <sub>2</sub> <sup>+</sup>                  | Indole/<br>MGB?    |
| 10 | 4072-2913 | 002 | C07 | <br>C <sub>18</sub> H <sub>19</sub> BrN <sub>4</sub> O <sub>2</sub> S              | Indole/<br>MGB?    |
| 11 | 4896-0742 | 003 | A02 | <br>C <sub>11</sub> H <sub>5</sub> Br <sub>2</sub> N <sub>3</sub> O <sub>2</sub> S | Indole/ BA<br>like |
| 12 | 5587-0183 | 003 | D10 | <br>C <sub>22</sub> H <sub>25</sub> BrN <sub>2</sub> O <sub>7</sub>               | Indole             |
| 13 | 5926-0045 | 004 | C04 | <br>C <sub>18</sub> H <sub>24</sub> BrN <sub>2</sub> O <sub>4</sub> <sup>+</sup> | Indole             |
| 14 | 6253-0066 | 005 | A05 | <br>C <sub>19</sub> H <sub>19</sub> N <sub>2</sub> O <sub>2</sub> <sup>+</sup>   | Indole             |
| 15 | 6253-0495 | 005 | B05 | <br>C <sub>21</sub> H <sub>24</sub> NO <sub>2</sub> <sup>+</sup>                 | Indole             |
| 16 | 6583-0310 | 005 | D07 | <br>C <sub>19</sub> H <sub>25</sub> N <sub>3</sub>                               | Indole             |
| 17 | 7771-0535 | 006 | G04 | <br>C <sub>24</sub> H <sub>28</sub> NO <sub>3</sub> <sup>+</sup>                 | Indole             |
| 18 | 7771-0670 | 006 | A05 | <br>C <sub>22</sub> H <sub>22</sub> NO <sub>4</sub> <sup>+</sup>                 | Indole             |
| 19 | 7771-0704 | 006 | B05 | <br>C <sub>22</sub> H <sub>25</sub> N <sub>2</sub> <sup>+</sup>                  | Indole             |
| 20 | C066-3077 | 006 | D06 | <br>C <sub>9</sub> H <sub>6</sub> ClNO                                           | Indole             |

|    |           |     |     |                                                                                                                  |         |
|----|-----------|-----|-----|------------------------------------------------------------------------------------------------------------------|---------|
| 21 | C324-2667 | 007 | E02 | 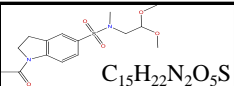<br><chem>C15H22N2O5S</chem>    | Indole? |
| 22 | C361-2059 | 007 | B03 | <br><chem>C20H28N2O4S</chem>    | Indole? |
| 23 | E667-0090 | 008 | D03 | <br><chem>C18H26N2O3S</chem>    | Indole? |
| 24 | E746-0671 | 008 | B04 | <br><chem>C22H24N2O4S</chem>    | Indole? |
| 25 | E959-1820 | 008 | F04 | <br><chem>C17H15N3O4S</chem>    | Indole? |
| 26 | E966-0516 | 008 | G04 | <br><chem>C14H16N2O3S</chem>    | Indole? |
| 27 | E966-0521 | 008 | H04 | <br><chem>C16H20N2O4S</chem>    | Indole? |
| 28 | E966-0548 | 008 | A05 | <br><chem>C18H22N2O5S</chem>    | Indole? |
| 29 | E966-0571 | 008 | B05 | <br><chem>C20H20N2O3S</chem>    | Indole? |
| 30 | E966-0620 | 008 | C05 | <br><chem>C18H20N2O3S2</chem>  | Indole? |
| 31 | K780-0136 | 008 | D09 | <br><chem>C11H11NO</chem>     | Indole  |
| 32 | 4896-1409 | 003 | B02 | <br><chem>C18H15N5S</chem>    | Indole  |
| 33 | 4896-2167 | 003 | C02 | <br><chem>C11H8N6</chem>      | Indole  |
| 34 | 4896-2883 | 003 | D02 | <br><chem>C11H8N6S</chem>     | Indole  |
| 35 | 4896-3047 | 003 | E02 | <br><chem>C11H8N6S</chem>     | Indole  |
| 36 | 4896-4941 | 003 | C03 | <br><chem>C18H12ClN3O2</chem> | Indole  |
| 37 | 5605-0007 | 003 | C11 | <br><chem>C24H21N3O4</chem>   | Indole  |
| 38 | 5984-0157 | 004 | F05 | <br><chem>C20H11NO2S</chem>   | Indole  |
| 39 | 5984-0171 | 004 | H05 | <br><chem>C17H10N2O2S2</chem> | Indole  |
| 40 | 6196-0080 | 004 | E10 | <br><chem>C19H12F3N5O2</chem> | Indole  |

|    |           |     |     |                                                                                                                 |          |
|----|-----------|-----|-----|-----------------------------------------------------------------------------------------------------------------|----------|
| 41 | 6260-2307 | 005 | E06 | 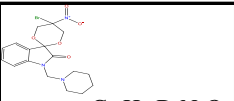<br>$C_{17}H_{20}BrN_3O_5$     | Indole   |
| 42 | 6637-1033 | 005 | H07 | <br>$C_{29}H_{24}BrN_3O_2$     | Indole   |
| 43 | 6944-0056 | 005 | G08 | <br>$C_{25}H_{31}BrN_2O_6$     | Indoline |
| 44 | C104-0030 | 006 | E07 | <br>$C_{20}H_{23}N_2^+$        | Indole   |
| 45 | C137-2374 | 006 | F07 | <br>$C_{20}H_{28}BrN_3O_3S$    | Indole?  |
| 46 | C348-0024 | 007 | F02 | <br>$C_{21}H_{21}ClFN_5O_2S_2$ | Indole   |
| 47 | C356-0052 | 007 | G02 | <br>$C_{24}H_{21}N_5O_5S_2$    | Indole   |
| 48 | E746-0060 | 008 | A04 | <br>$C_{17}H_{15}N_3O_2S$     | Indoline |

## S3-7 - Benzofurazan

|   | 1         | 2   | 3   | 4                                                                                                                                                    | 5            |
|---|-----------|-----|-----|------------------------------------------------------------------------------------------------------------------------------------------------------|--------------|
| 1 | 3660-0336 | 002 | E05 | <br>C <sub>14</sub> H <sub>12</sub> N <sub>4</sub> O <sub>3</sub>   | Benzofurazan |
| 2 | C091-0115 | 006 | G06 | <br>C <sub>17</sub> H <sub>19</sub> N <sub>5</sub> O <sub>7</sub>   | Benzofurazan |
| 3 | C091-0248 | 006 | H06 | <br>C <sub>15</sub> H <sub>15</sub> N <sub>5</sub> O <sub>5</sub>   | Benzofurazan |
| 4 | C091-0304 | 006 | A07 | <br>C <sub>17</sub> H <sub>26</sub> N <sub>6</sub> O <sub>4</sub>   | Benzofurazan |
| 5 | K784-6198 | 008 | A10 | <br>C <sub>16</sub> H <sub>12</sub> N <sub>6</sub> O <sub>5</sub> S | Benzofurazan |
| 6 | K786-2882 |     | C10 | <br>C <sub>15</sub> H <sub>16</sub> N <sub>6</sub> O <sub>5</sub> S | Benzofurazan |

S3-8 - 5-imino-5,6-dihydro-7H-[1,3,4]thiadiazolo[3,2-a]pyrimidin-7-one

|    | 1         | 2   | 3   | 4                                                                                                                                                                   |
|----|-----------|-----|-----|---------------------------------------------------------------------------------------------------------------------------------------------------------------------|
| 1  | C356-0074 | 007 | H02 | 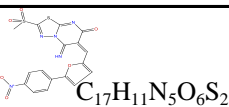<br>C <sub>17</sub> H <sub>11</sub> N <sub>5</sub> O <sub>6</sub> S <sub>2</sub>   |
| 2  | C370-3531 | 007 | E03 | <br>C <sub>16</sub> H <sub>9</sub> Cl <sub>2</sub> N <sub>5</sub> OS               |
| 3  | C370-4282 | 007 | F03 | <br>C <sub>20</sub> H <sub>12</sub> ClN <sub>5</sub> O <sub>2</sub> S              |
| 4  | C370-4289 | 007 | G03 | <br>C <sub>22</sub> H <sub>17</sub> N <sub>5</sub> O <sub>3</sub> S                |
| 5  | C370-4307 | 007 | H03 | <br>C <sub>20</sub> H <sub>11</sub> ClN <sub>6</sub> O <sub>4</sub> S              |
| 6  | C370-5084 | 007 | A04 | <br>C <sub>17</sub> H <sub>12</sub> FN <sub>5</sub> OS <sub>2</sub>                |
| 7  | C370-5164 | 007 | B04 | <br>C <sub>18</sub> H <sub>14</sub> N <sub>6</sub> O <sub>3</sub> S <sub>2</sub>   |
| 8  | C679-0721 | 007 | A08 | <br>C <sub>22</sub> H <sub>19</sub> N <sub>7</sub> O <sub>3</sub> S <sub>2</sub>  |
| 9  | C679-1685 | 007 | B08 | <br>C <sub>23</sub> H <sub>20</sub> N <sub>6</sub> O <sub>5</sub> S              |
| 10 | C679-1708 | 007 | C08 | <br>C <sub>23</sub> H <sub>19</sub> N <sub>7</sub> O <sub>4</sub> S <sub>2</sub> |
| 11 | C482-0405 | 007 | H04 | <br>C <sub>12</sub> H <sub>8</sub> BrN <sub>3</sub> O <sub>3</sub>               |
| 12 | C482-0623 | 007 | A05 | <br>C <sub>20</sub> H <sub>14</sub> BrN <sub>3</sub> O <sub>5</sub> S            |

## S3-9 - Quinoline

|    | 1         | 2   | 3   | 4                                                                                                            | 5         |
|----|-----------|-----|-----|--------------------------------------------------------------------------------------------------------------|-----------|
| 1  | 0099-0209 | 001 | B02 | <br>$C_{12}H_{14}N^+$       | Quinoline |
| 2  | 0422-0118 | 001 | F02 | <br>$C_{10}H_7Cl_2NO_2$     | Quinoline |
| 3  | 0986-0007 | 001 | B03 | <br>$C_{11}H_{11}N_2O^+$    | Quinoline |
| 4  | 1365-0165 | 001 | E05 | <br>$C_{18}H_{18}N_2O_2S_2$ | Quinoline |
| 5  | 1365-0179 | 001 | F05 | <br>$C_{17}H_{18}N_2O_3S$   | Quinoline |
| 6  | 1607-0150 | 001 | D07 | <br>$C_{11}H_{11}NO_2$      | Quinoline |
| 7  | 2055-0058 | 001 | E10 | <br>$C_{15}H_{15}N_3OS_2$   | Quinoline |
| 8  | 3853-0028 | 002 | B06 | <br>$C_{18}H_{19}N_2^+$     | Quinoline |
| 9  | 3853-0032 | 002 | C06 | <br>$C_{17}H_{17}N_2^+$     | Quinoline |
| 10 | 4971-0044 | 003 | G03 | <br>$C_{23}H_{23}N_2^+$     | Quinoline |
| 11 | 5294-0006 | 003 | C07 | <br>$C_{19}H_{13}NO_3$     | Quinoline |
| 12 | 5509-0001 | 003 | G08 | <br>$C_{19}H_{16}NO_2^+$  | Quinoline |
| 13 | 5509-0002 | 003 | H08 | <br>$C_{16}H_{14}NO^+$    | Quinoline |
| 14 | 5509-0003 | 003 | A09 | <br>$C_{18}H_{15}FN^+$    | Quinoline |
| 15 | 5984-0371 | 004 | B06 | <br>$C_{16}H_{14}N_2O$    | Quinoline |
| 16 | 5984-0373 | 004 | C06 | <br>$C_{20}H_{23}N_3$     | Quinoline |
| 17 | 5984-0401 | 004 | E06 | <br>$C_{19}H_{16}NO_2^+$  | Quinoline |
| 18 | 6253-0534 | 005 | C05 | <br>$C_{21}H_{19}N_2^+$   | Quinoline |
| 19 | 6253-0536 | 005 | D05 | <br>$C_{21}H_{19}N_2^+$   | Quinoline |
| 20 | 6253-0562 | 005 | E05 | <br>$C_{18}H_{19}N_2O^+$  | Quinoline |

|    |           |     |     |                                                                                                                 |                         |
|----|-----------|-----|-----|-----------------------------------------------------------------------------------------------------------------|-------------------------|
| 21 | 6253-0587 | 005 | F05 | 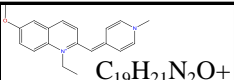<br>$C_{19}H_{21}N_2O^+$       | Quinoline               |
| 22 | 7165-0007 | 005 | D10 | <br>$C_{24}H_{25}N_2^+$        | Quinoline               |
| 23 | 7165-0069 | 005 | F10 | <br>$C_{19}H_{21}N_2^+$        | Quinoline               |
| 24 | 7165-0232 | 005 | A11 | <br>$C_{23}H_{23}N_2^+$        | Quinoline               |
| 25 | 7165-0250 | 005 | B11 | <br>$C_{23}H_{23}N_2^+$        | Quinoline               |
| 26 | 7165-0265 | 005 | C11 | <br>$C_{19}H_{21}N_2^+$        | Quinoline               |
| 27 | 7165-0448 | 005 | D11 | <br>$C_{23}H_{23}N_2^+$        | Quinoline               |
| 28 | 7165-0474 | 005 | E11 | <br>$C_{18}H_{10}ClNO_2$       | Quinoline/<br>Coumarine |
| 29 | 7165-0683 | 005 | F11 | <br>$C_{25}H_{25}N_2^+$        | Quinoline               |
| 30 | 7165-0735 | 005 | G11 | <br>$C_{18}H_{17}N_3O_4S$      | Quinoline               |
| 31 | 7165-0736 | 005 | H11 | <br>$C_{18}H_{17}N_3O_4S$     | Quinoline               |
| 32 | 7165-0800 | 006 | C02 | <br>$C_{23}H_{23}N_2^+$      | Quinoline               |
| 33 | 7287-0084 | 006 | G03 | <br>$C_{25}H_{17}FN_2O_3S_2$ | Quinoline               |
| 34 | 7771-0718 | 006 | D05 | <br>$C_{21}H_{23}N_2^+$      | Quinoline/<br>Pyridine  |
| 35 | 7771-0797 | 006 | G05 | <br>$C_{21}H_{23}N_2^+$      | Quinoline/<br>Pyridine  |
| 36 | 7771-0816 | 006 | H05 | <br>$C_{21}H_{23}N_2^+$      | Quinoline/<br>Pyridine  |
| 37 | 7832-0186 | 006 | B06 | <br>$C_{20}H_{15}N_7O_3S_3$  | Quinoline               |
| 38 | C276-0761 | 006 | E10 | <br>$C_{15}H_{14}FNO_2$      | Quinoline?              |
| 39 | K511-0001 | 008 | C09 | <br>$C_{15}H_{17}N_3O_5S$    | Quinoline               |
| 40 | K906-2202 | 008 | B11 | <br>$C_{14}H_{13}N_5O_3S_3$  | Quinoline               |

|    |           |     |     |                                                                                                                                                                     |                                         |
|----|-----------|-----|-----|---------------------------------------------------------------------------------------------------------------------------------------------------------------------|-----------------------------------------|
| 41 | 6253-0052 | 005 | H04 | 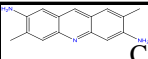<br>C <sub>15</sub> H <sub>15</sub> N <sub>3</sub>                                 | Quinoline/<br>Intercalator              |
| 42 | 6565-0078 | 005 | C07 | <br>C <sub>23</sub> H <sub>18</sub> N <sub>2</sub> O <sub>3</sub> S                | Quinoline                               |
| 43 | 7771-0510 | 006 | E04 | <br>C <sub>23</sub> H <sub>23</sub> N <sub>2</sub> <sup>+</sup>                    | Quinoline/<br>Pyridine/<br>Intercalator |
| 44 | 7771-0519 | 006 | F04 | <br>C <sub>23</sub> H <sub>23</sub> N <sub>2</sub> <sup>+</sup>                    | Quinoline/<br>Pyridine/<br>Intercalator |
| 45 | 7771-0539 | 006 | H04 | <br>C <sub>23</sub> H <sub>23</sub> N <sub>2</sub> <sup>+</sup>                    | Quinoline/<br>Pyridine/<br>Intercalator |
| 46 | C498-0038 | 007 | C05 | <br>C <sub>18</sub> H <sub>18</sub> ClN <sub>3</sub> O <sub>2</sub> S              | Quinoline/<br>Substituted<br>Benzamide  |
| 47 | C593-0426 | 007 | E06 | <br>C <sub>23</sub> H <sub>23</sub> N <sub>5</sub> O <sub>2</sub>                  | Quinoline/<br>Substituted<br>Benzamide  |
| 48 | 5586-3582 | 003 | B10 | <br>C <sub>13</sub> H <sub>11</sub> N <sub>3</sub> O <sub>3</sub>                  | Quinoline?                              |
| 49 | 1203-0146 | 001 | F04 | <br>C <sub>15</sub> H <sub>11</sub> ClN <sub>2</sub> S                             | Quinoline?                              |
| 50 | 3651-6382 | 002 | C05 | <br>C <sub>20</sub> H <sub>12</sub> F <sub>2</sub> N <sub>4</sub> O <sub>3</sub> | Quinoline?                              |



## S3-10 - Naphtalene

|    | 1         | 2   | 3   | 4                                                                                                                | 5                          |
|----|-----------|-----|-----|------------------------------------------------------------------------------------------------------------------|----------------------------|
| 1  | 1190-0035 | 001 | D04 | <br>$C_{10}H_3Cl_2NO_4$         | Napthoquinone              |
| 2  | 1634-0012 | 001 | G07 | <br>$C_{11}H_7BrO_2$            | Naphtalene                 |
| 3  | 1697-1661 | 001 | D08 | <br>$C_{14}H_{10}N_4O_3$        | Naphtalene                 |
| 4  | 4204-0055 | 002 | E08 | <br>$C_{18}H_{11}ClINO_3$       | Naphthoquinone             |
| 5  | 5369-0006 | 003 | H07 | <br>$C_{16}H_{16}ClNO_4$        | Naphthoquinone             |
| 6  | 5591-3854 | 003 | H10 | <br>$C_{16}H_{13}NO_5S_3$       | Naphtalene                 |
| 7  | 5591-3872 | 003 | A11 | <br>$C_{19}H_{16}BrNO_3S$       | Naphtalene                 |
| 8  | 5267-1176 | 003 | G06 | <br>$C_{21}H_{17}N_3O_2$        | Naphtalene                 |
| 9  | 6232-2814 | 005 | D04 | <br>$C_{14}H_{12}O_3$           | Naphthoquinone             |
| 10 | 6623-0252 | 005 | F07 | <br>$C_{15}H_{17}NO$           | Naphtalene?<br>(Tetralone) |
| 11 | 7202-0307 | 006 | F02 | <br>$C_{21}H_{19}NO_5S_2$     | Naphtalene                 |
| 12 | 7202-1961 | 006 | G02 | <br>$C_{18}H_{11}ClN_4O_3S_2$ | Naphthalene/<br>Triazole   |
| 13 | 7202-2009 | 006 | H02 | <br>$C_{21}H_{18}N_4O_3S_2$   | Naphthalene/<br>Triazole   |
| 14 | 7202-2068 | 006 | A03 | <br>$C_{19}H_{14}N_4O_4S_2$   | Naphthalene/<br>Triazole   |
| 15 | 7202-2236 | 006 | B03 | <br>$C_{20}H_{13}NO_3S_3$     | Naphthalene                |
| 16 | 7287-0822 | 006 | H03 | <br>$C_{18}H_{14}N_2O_5S$     | Naphthalene                |

S3-11 contains 345 new PARP-1 inhibitors without obvious structural core similarities to other groups

|    | 1         | 2   | 3   | 4                                                                                                                                                                 |
|----|-----------|-----|-----|-------------------------------------------------------------------------------------------------------------------------------------------------------------------|
| 1  | 2062-0101 | 001 | F10 | 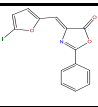<br>C <sub>14</sub> H <sub>8</sub> INO <sub>3</sub>                              |
| 2  | 2062-0104 | 001 | G10 | <br>C <sub>15</sub> H <sub>10</sub> INO <sub>3</sub>                             |
| 3  | 2062-0626 | 001 | H10 | <br>C <sub>16</sub> H <sub>10</sub> INO <sub>2</sub>                             |
| 4  | 2141-0230 | 001 | A11 | <br>C <sub>17</sub> H <sub>17</sub> N <sub>3</sub> OS                            |
| 5  | 1670-1776 | 001 | A08 | <br>C <sub>16</sub> H <sub>17</sub> BrN <sub>2</sub> O <sub>5</sub>              |
| 6  | 1688-0128 | 001 | B08 | <br>C <sub>18</sub> H <sub>17</sub> ClN <sub>2</sub> O <sub>5</sub>              |
| 7  | C097-0054 | 006 | B07 | <br>C <sub>15</sub> H <sub>9</sub> F <sub>4</sub> N <sub>3</sub> O <sub>5</sub> |
| 8  | 3553-1484 | 002 | D03 | <br>C <sub>19</sub> H <sub>14</sub> O <sub>4</sub>                             |
| 9  | 5202-0591 | 003 | C05 | <br>C <sub>11</sub> H <sub>14</sub> N <sub>2</sub> O <sub>7</sub>              |
| 10 | 4167-0094 | 002 | C08 | <br>C <sub>17</sub> H <sub>15</sub> NO <sub>7</sub> S                          |
| 11 | 6228-0266 | 004 | C11 | <br>C <sub>14</sub> H <sub>22</sub> NO <sub>3</sub> <sup>+</sup>               |
| 12 | 6228-0706 | 005 | A03 | <br>C <sub>21</sub> H <sub>34</sub> NO <sub>3</sub> <sup>+</sup>               |
| 13 | 6228-0778 | 005 | C03 | <br>C <sub>15</sub> H <sub>30</sub> NO <sub>2</sub> <sup>+</sup>               |
| 14 | 6228-0879 | 005 | D03 | <br>C <sub>15</sub> H <sub>26</sub> NO <sub>2</sub> <sup>+</sup>               |
| 15 | 6228-1188 | 005 | G03 | <br>C <sub>19</sub> H <sub>33</sub> NO <sub>2</sub>                            |
| 16 | 6228-1189 | 005 | H03 | <br>C <sub>15</sub> H <sub>28</sub> NO <sub>4</sub> <sup>+</sup>               |
| 17 | 5212-2884 | 003 | D05 | <br>C <sub>14</sub> H <sub>26</sub> NO <sub>3</sub> <sup>+</sup>               |
| 18 | 6228-0663 | 005 | G02 | <br>C <sub>14</sub> H <sub>26</sub> NO <sub>2</sub> <sup>+</sup>               |

|    |           |     |     |                                                                                                                |
|----|-----------|-----|-----|----------------------------------------------------------------------------------------------------------------|
| 19 | 6228-0683 | 005 | H02 | 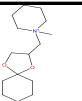<br>$C_{15}H_{28}NO_2^+$      |
| 20 | 6228-0288 | 004 | D11 | <br>$C_{18}H_{34}NO_2^+$      |
| 21 | 6228-0476 | 004 | H11 | <br>$C_{16}H_{30}NO_3^+$      |
| 22 | 6228-0650 | 005 | F02 | <br>$C_{20}H_{38}NO_2^+$      |
| 23 | 6228-0712 | 005 | B03 | <br>$C_{14}H_{28}NO_2^+$      |
| 24 | 6228-1073 | 005 | E03 | <br>$C_{17}H_{32}N_2O_4^+$    |
| 25 | 6228-1187 | 005 | F03 | <br>$C_{18}H_{34}NO_2^+$      |
| 26 | 6266-1910 | 005 | F06 | <br>$C_{15}H_{10}BrNO_3$      |
| 27 | C356-0367 | 007 | A03 | <br>$C_{18}H_{11}ClN_4O_5S_3$ |
| 28 | 3570-0705 | 002 | E03 | <br>$C_{19}H_{23}BrO_5$       |
| 29 | 3577-0031 | 002 | F03 | <br>$C_{19}H_{23}BrO_5$      |
| 30 | 3594-0500 | 002 | H03 | <br>$C_{17}H_{13}Br_2NO_4S$ |
| 31 | 4055-0071 | 002 | B07 | <br>$C_{14}H_{25}N_2O_5S^+$ |
| 32 | 4191-1671 | 002 | D08 | <br>$C_9H_{12}N_2O_3$       |
| 33 | 4896-3285 | 003 | F02 | <br>$C_{19}H_{16}N_4O_2S$   |
| 34 | C151-0185 | 006 | G07 | <br>$C_{16}H_{13}Br_2NO_3$  |
| 35 | C791-0277 | 007 | G08 | <br>$C_{15}H_{15}N_3O_3S$   |
| 36 | C200-4587 | 006 | B09 | <br>$C_6H_6N_4OS$           |
| 37 | E781-0384 | 008 | C04 | <br>$C_{16}H_{17}ClN_6O$    |
| 38 | E781-0648 | 008 | D04 | <br>$C_{15}H_{17}FN_6$      |

|    |           |     |     |                                                                                                                                                                     |
|----|-----------|-----|-----|---------------------------------------------------------------------------------------------------------------------------------------------------------------------|
| 39 | C099-0343 | 006 | C07 | 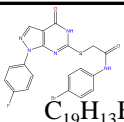<br>C <sub>19</sub> H <sub>13</sub> BrFN <sub>5</sub> O <sub>2</sub> S             |
| 40 | C099-0349 | 006 | D07 | <br>C <sub>21</sub> H <sub>16</sub> FN <sub>5</sub> O <sub>4</sub> S               |
| 41 | E944-0204 | 008 | E04 | <br>C <sub>16</sub> H <sub>26</sub> N <sub>6</sub> O                               |
| 42 | 1710-0003 | 001 | F08 | <br>C <sub>13</sub> H <sub>14</sub> ClNO <sub>2</sub> S                            |
| 43 | 7771-0510 | 006 | E04 | <br>C <sub>23</sub> H <sub>23</sub> N <sub>2</sub> <sup>+</sup>                    |
| 44 | 7771-0519 | 006 | F04 | <br>C <sub>23</sub> H <sub>23</sub> N <sub>2</sub> <sup>+</sup>                    |
| 45 | 7771-0539 | 006 | H04 | <br>C <sub>23</sub> H <sub>23</sub> N <sub>2</sub> <sup>+</sup>                    |
| 46 | C498-0038 | 007 | C05 | <br>C <sub>18</sub> H <sub>18</sub> ClN <sub>3</sub> O <sub>2</sub> S              |
| 47 | C593-0426 | 007 | E06 | <br>C <sub>23</sub> H <sub>23</sub> N <sub>5</sub> O <sub>2</sub>                 |
| 48 | 5586-3582 | 003 | B10 | <br>C <sub>13</sub> H <sub>11</sub> N <sub>3</sub> O <sub>3</sub>                |
| 49 | 1203-0146 | 001 | F04 | <br>C <sub>15</sub> H <sub>11</sub> ClN <sub>2</sub> S                           |
| 50 | 3651-6382 | 002 | C05 | <br>C <sub>20</sub> H <sub>12</sub> F <sub>2</sub> N <sub>4</sub> O <sub>3</sub> |
| 51 | 2759-0749 | 002 | G02 | <br>C <sub>11</sub> H <sub>14</sub> N <sub>2</sub> S <sub>2</sub>                |
| 52 | 3132-1829 | 002 | A03 | <br>C <sub>14</sub> H <sub>13</sub> N <sub>3</sub> S <sub>2</sub>                |
| 53 | 4111-1314 | 002 | D07 | <br>C <sub>9</sub> H <sub>8</sub> N <sub>2</sub> S                               |
| 54 | 4306-0004 | 002 | A09 | <br>C <sub>22</sub> H <sub>21</sub> N <sub>3</sub> OS <sub>2</sub>               |
| 55 | 6085-0126 | 004 | H09 | <br>C <sub>19</sub> H <sub>27</sub> N <sub>3</sub> OS                            |
| 56 | 0126-0222 | 001 | D02 | <br>C <sub>14</sub> H <sub>14</sub> NO <sup>+</sup>                              |
| 57 | 0655-0099 | 001 | G02 | <br>C <sub>10</sub> H <sub>12</sub> N <sub>2</sub> S                             |

|    |           |     |     |                                                                                                             |
|----|-----------|-----|-----|-------------------------------------------------------------------------------------------------------------|
| 58 | 0865-0024 | 001 | H02 |  $C_{12}H_{14}N_3^+$       |
| 59 | 0865-0043 | 001 | A03 |  $C_{14}H_{14}N^+$         |
| 60 | 1080-0789 | 001 | F03 |  $C_{16}H_{12}N_2O$        |
| 61 | 1142-0034 | 001 | H03 |  $C_9H_{10}N_2OS$          |
| 62 | 2421-0135 | 002 | A02 |  $C_{17}H_{19}N_2O^+$      |
| 63 | 5984-0304 | 004 | A06 |  $C_{16}H_{18}N_2O_4^{2+}$ |
| 64 | 5858-0016 | 004 | H03 |  $C_{14}H_{20}NO_4^+$      |
| 65 | 5921-0164 | 004 | B04 |  $C_{12}H_{14}N_2O$        |
| 66 | 6228-0295 | 004 | E11 |  $C_{18}H_{26}NO_2^+$      |
| 67 | 7404-0007 | 006 | A04 |  $C_{13}H_{18}NO_4^+$      |
| 68 | C066-4192 | 006 | E06 |  $C_{11}H_{12}N_3O_3^+$    |
| 69 | C862-0619 | 007 | A09 |  $C_{20}H_{23}N_5O_2S$    |
| 70 | E534-0249 | 008 | B02 |  $C_{17}H_{23}N_3S$      |
| 71 | K783-6142 | 008 | H09 |  $C_8H_8N_2S$            |
| 72 | cc        | 001 | A02 |  $C_{18}H_{18}NS^+$      |
| 73 | 1114-0163 | 001 | G03 |  $C_{16}H_{12}N_6O_5S$   |
| 74 | 2368-0687 | 001 | G11 |  $C_{18}H_{14}BrN_3O_4S$ |
| 75 | 2513-4331 | 002 | D02 |  $C_{16}H_{20}N_4S$      |
| 76 | 5552-0139 | 003 | C09 |  $C_{16}H_{11}NO_5S$     |
| 77 | 5777-0232 | 004 | A03 |  $C_7H_{11}N_3O_2S$      |
| 78 | 5849-0916 | 004 | G03 |  $C_{17}H_{15}BrN_2S$    |

|    |           |     |     |                                                                                                                 |
|----|-----------|-----|-----|-----------------------------------------------------------------------------------------------------------------|
| 79 | 4872-0574 | 002 | F11 | 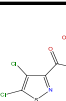<br><chem>C8H7Cl2NO4S</chem>   |
| 80 | 6115-0147 | 004 | A10 | <br><chem>C7H9N3O3S</chem>     |
| 81 | 6115-0248 | 004 | B10 | <br><chem>C8H11N3O3S</chem>    |
| 82 | 6250-0004 | 005 | F04 | <br><chem>C9H8N4OS</chem>      |
| 83 | G856-5586 | 008 | G06 | <br><chem>C18H24N2O3S</chem>   |
| 84 | G856-5601 | 008 | H06 | <br><chem>C19H19N3O4S</chem>   |
| 85 | G856-5602 | 008 | A07 | <br><chem>C15H18N2O3S</chem>   |
| 86 | G856-5603 | 008 | B07 | <br><chem>C17H21N3O4S</chem>   |
| 87 | G856-5604 | 008 | C07 | <br><chem>C17H22N2O4S</chem>   |
| 88 | G856-5607 | 008 | D07 | <br><chem>C18H24N2O3S</chem>  |
| 89 | G856-5616 | 008 | E07 | <br><chem>C20H21N3O5S</chem> |
| 90 | G856-5620 | 008 | F07 | <br><chem>C19H26N2O3S</chem> |
| 91 | G856-5628 | 008 | G07 | <br><chem>C15H17N3O3S</chem> |
| 92 | G856-5639 | 008 | H07 | <br><chem>C14H16N2O3S</chem> |
| 93 | G856-5646 | 008 | A08 | <br><chem>C14H18N2O4S</chem> |
| 94 | G856-5652 | 008 | B08 | <br><chem>C18H16N2O5S</chem> |
| 95 | 6944-0119 | 005 | C09 | <br><chem>C20H24NO3+</chem>  |
| 96 | E516-0462 | 008 | A02 | <br><chem>C22H30N4O2</chem>  |
| 97 | 6253-0026 | 005 | G04 | <br><chem>C11H12N4OS</chem>  |

|     |           |     |     |                                                                                                                  |
|-----|-----------|-----|-----|------------------------------------------------------------------------------------------------------------------|
| 98  | C515-0293 | 007 | B06 | <br><chem>C18H26N4O4S</chem>    |
| 99  | E734-0182 | 008 | G03 | <br><chem>C18H24N4O4S</chem>    |
| 100 | 6145-0419 | 004 | D10 | <br><chem>C23H28N2O5S3</chem>   |
| 101 | C620-0174 | 007 | A07 | <br><chem>C28H27N5O2</chem>     |
| 102 | C620-0474 | 007 | B07 | <br><chem>C29H28N4O4</chem>     |
| 103 | C620-0475 | 007 | C07 | <br><chem>C27H29N3O4</chem>     |
| 104 | 5989-2333 | 004 | F06 | <br><chem>C20H24N2</chem>       |
| 105 | 5989-2708 | 004 | G06 | <br><chem>C19H23N2O+</chem>     |
| 106 | 0KPI-0079 | 001 | C03 | <br><chem>C14H20N2S</chem>      |
| 107 | 6220-0414 | 004 | G10 | <br><chem>C11H12N2S</chem>     |
| 108 | 3733-0015 | 002 | F05 | <br><chem>C17H14ClN3S</chem>  |
| 109 | 4464-0911 | 002 | B09 | <br><chem>C16H18N4O2</chem>   |
| 110 | 4607-1262 | 002 | A10 | <br><chem>C12H17F3N2O2</chem> |
| 111 | D015-0271 | 007 | B09 | <br><chem>C13H13F3N2O3</chem> |
| 112 | 4670-0183 | 002 | B10 | <br><chem>C12H12ClN3OS</chem> |
| 113 | 4719-0276 | 002 | F10 | <br><chem>C8H6ClN3S</chem>    |
| 114 | 4719-0287 | 002 | G10 | <br><chem>C13H17N3S</chem>    |
| 115 | 5633-3591 | 003 | E11 | <br><chem>C13H15N3O2S</chem>  |
| 116 | 5865-4148 | 004 | A04 | <br><chem>C10H10BrN3S</chem>  |
| 117 | 5720-0252 | 004 | B02 | <br><chem>C5H6N6S</chem>      |

|     |           |     |     |                                                                                                                   |
|-----|-----------|-----|-----|-------------------------------------------------------------------------------------------------------------------|
| 118 | 5933-0708 | 004 | G04 | 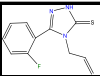<br><chem>C11H10FN3S</chem>      |
| 119 | 6049-0477 | 004 | E09 | <br><chem>C9H10N4S</chem>        |
| 120 | 6232-3307 | 005 | E04 | <br><chem>C8H8N4S</chem>         |
| 121 | 6048-0021 | 004 | A07 | <br><chem>C8H10N4OS</chem>       |
| 122 | 6049-0226 | 004 | G07 | <br><chem>C11H16ClN5S</chem>     |
| 123 | 6049-0232 | 004 | H07 | <br><chem>C9H13N5S</chem>        |
| 124 | 6049-0260 | 004 | A08 | <br><chem>C9H12ClN5S</chem>      |
| 125 | 6049-0364 | 004 | G08 | <br><chem>C11H16ClN5OS</chem>    |
| 126 | 6049-0444 | 004 | B09 | <br><chem>C10H14ClN5S</chem>     |
| 127 | 6049-0461 | 004 | C09 | <br><chem>C10H13N3S2</chem>      |
| 128 | 6049-0464 | 004 | D09 | <br><chem>C9H11N3OS</chem>       |
| 129 |           | 004 | C10 | <br><chem>C10H10N4O2S</chem>    |
| 130 | 6210-0487 | 004 | F10 | <br><chem>C10H11N3O2S</chem>   |
| 131 | 6521-0200 | 005 | B07 | <br><chem>C11H17N3O2S</chem>   |
| 132 | D291-0130 | 007 | D11 | <br><chem>C8H10N6O2S</chem>    |
| 133 | K780-1061 | 008 | F09 | <br><chem>C8H10N4S</chem>      |
| 134 | 7286-2215 | 006 | F03 | <br><chem>C4H4N6OS</chem>      |
| 135 | 0350-0159 | 001 | E02 | <br><chem>C8H6N2O2S</chem>     |
| 136 | 4696-1323 | 002 | C10 | <br><chem>C12H14N2O2S</chem>   |
| 137 | C200-5078 | 006 | C09 | <br><chem>C12H10ClN3O2S</chem> |
| 138 | 4497-0019 | 002 | E09 | <br><chem>C12H18N6OS2</chem>   |



|     |           |     |     |                                                                                                                                                                      |
|-----|-----------|-----|-----|----------------------------------------------------------------------------------------------------------------------------------------------------------------------|
| 139 | 4570-0044 | 002 | F09 | 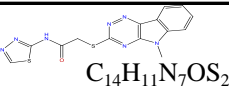<br>C <sub>14</sub> H <sub>11</sub> N <sub>7</sub> OS <sub>2</sub>                  |
| 140 | C301-3836 | 006 | E11 | <br>C <sub>6</sub> H <sub>4</sub> Cl <sub>2</sub> N <sub>4</sub> O <sub>2</sub>     |
| 141 | 1927-7417 | 001 | A10 | <br>C <sub>15</sub> H <sub>10</sub> Br <sub>2</sub> N <sub>4</sub> OS               |
| 142 | 4030-0007 | 002 | A07 | <br>C <sub>14</sub> H <sub>25</sub> N <sub>5</sub> S                                |
| 143 | 4896-0340 | 002 | H11 | <br>C <sub>15</sub> H <sub>10</sub> Br <sub>2</sub> N <sub>4</sub> O <sub>2</sub> S |
| 144 | 4896-4195 | 003 | H02 | <br>C <sub>12</sub> H <sub>12</sub> N <sub>6</sub> S                                |
| 145 | 4896-4273 | 003 | B03 | <br>C <sub>14</sub> H <sub>13</sub> N <sub>5</sub> S                                |
| 146 | 5236-0076 | 003 | B06 | <br>C <sub>17</sub> H <sub>16</sub> FN <sub>3</sub> O <sub>3</sub> S                |
| 147 | 5236-0120 | 003 | C06 | <br>C <sub>12</sub> H <sub>10</sub> N <sub>4</sub> O <sub>2</sub> S <sub>3</sub>    |
| 148 | 5236-0123 | 003 | D06 | <br>C <sub>14</sub> H <sub>11</sub> N <sub>3</sub> O <sub>2</sub> S <sub>2</sub>   |
| 149 | 5366-2750 | 003 | G07 | <br>C <sub>13</sub> H <sub>11</sub> N <sub>3</sub> O <sub>2</sub> S               |
| 150 | 5742-0465 | 004 | C02 | <br>C <sub>13</sub> H <sub>15</sub> N <sub>3</sub> S                              |
| 151 | 5742-1007 | 004 | E02 | <br>C <sub>15</sub> H <sub>14</sub> N <sub>4</sub> S                              |
| 152 | 5742-1010 | 004 | F02 | <br>C <sub>12</sub> H <sub>14</sub> N <sub>4</sub> S                              |
| 153 | 5742-1015 | 004 | G02 | <br>C <sub>15</sub> H <sub>14</sub> N <sub>4</sub> O <sub>2</sub> S               |
| 154 | 5742-1018 | 004 | H02 | <br>C <sub>13</sub> H <sub>9</sub> FN <sub>4</sub> S                              |
| 155 | 5933-0676 | 004 | D04 | <br>C <sub>17</sub> H <sub>25</sub> N <sub>3</sub> OS                             |
| 156 | 5933-0687 | 004 | E04 | <br>C <sub>13</sub> H <sub>10</sub> FN <sub>3</sub> OS                            |
| 157 | 5933-0690 | 004 | F04 | <br>C <sub>12</sub> H <sub>14</sub> FN <sub>3</sub> S                             |

|     |           |     |     |                                                                                                                                                          |
|-----|-----------|-----|-----|----------------------------------------------------------------------------------------------------------------------------------------------------------|
| 158 | 5933-0712 | 004 | H04 | 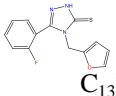<br>C <sub>13</sub> H <sub>10</sub> FN <sub>3</sub> OS                  |
| 159 | 5933-0736 | 004 | A05 | <br>C <sub>15</sub> H <sub>12</sub> FN <sub>3</sub> S                   |
| 160 | 6049-0116 | 004 | B07 | <br>C <sub>14</sub> H <sub>15</sub> N <sub>5</sub> S                    |
| 161 | 6049-0121 | 004 | C07 | <br>C <sub>14</sub> H <sub>15</sub> N <sub>5</sub> S                    |
| 162 | 6049-0149 | 004 | D07 | <br>C <sub>13</sub> H <sub>12</sub> FN <sub>5</sub> S                   |
| 163 | 6049-0155 | 004 | E07 | <br>C <sub>15</sub> H <sub>16</sub> ClN <sub>5</sub> OS                 |
| 164 | 6049-0225 | 004 | F07 | <br>C <sub>12</sub> H <sub>12</sub> BrN <sub>5</sub> OS                 |
| 165 | 6049-0275 | 004 | B08 | <br>C <sub>14</sub> H <sub>14</sub> BrN <sub>5</sub> S                  |
| 166 | 6049-0277 | 004 | C08 | <br>C <sub>12</sub> H <sub>12</sub> ClN <sub>5</sub> OS                |
| 167 | 6049-0292 | 004 | D08 | <br>C <sub>12</sub> H <sub>13</sub> N <sub>5</sub> OS                 |
| 168 | 6049-0293 | 004 | E08 | <br>C <sub>13</sub> H <sub>13</sub> N <sub>5</sub> S                  |
| 169 | 6049-0295 | 004 | F08 | <br>C <sub>14</sub> H <sub>14</sub> ClN <sub>5</sub> OS               |
| 170 | 6049-0372 | 004 | H08 | <br>C <sub>15</sub> H <sub>16</sub> ClN <sub>5</sub> S                |
| 171 | 6049-0398 | 004 | A09 | <br>C <sub>13</sub> H <sub>12</sub> ClN <sub>5</sub> OS               |
| 172 | 6220-1294 | 004 | A11 | <br>C <sub>14</sub> H <sub>18</sub> N <sub>4</sub> OS                 |
| 173 | 6232-1273 | 005 | B04 | <br>C <sub>18</sub> H <sub>24</sub> N <sub>4</sub> O <sub>2</sub> S   |
| 174 | 6516-0027 | 005 | A07 | <br>C <sub>15</sub> H <sub>17</sub> N <sub>5</sub> S                  |
| 175 | 7012-0549 | 005 | A10 | <br>C <sub>21</sub> H <sub>14</sub> BrN <sub>5</sub> O <sub>2</sub> S |

|     |           |     |     |                                                                                                                |
|-----|-----------|-----|-----|----------------------------------------------------------------------------------------------------------------|
| 176 | 5508-0335 | 003 | F08 | 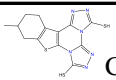<br>$C_{13}H_{12}N_6S_3$      |
| 177 | 5586-4259 | 003 | C10 | <br>$C_{10}H_8N_6S_3$         |
| 178 | 6280-0685 | 005 | G06 | <br>$C_{12}H_{13}N_5S_3$      |
| 179 | C301-3719 | 006 | D11 | <br>$C_9H_6N_4S_2$            |
| 180 | 4789-3748 | 002 | D11 | <br>$C_{18}H_{16}N_4S$        |
| 181 | 6618-0003 | 005 | E07 | <br>$C_{15}H_9ClN_4$          |
| 182 | C200-3973 | 006 | A09 | <br>$C_{12}H_{12}N_4O_3$      |
| 183 | C301-1229 | 006 | H10 | <br>$C_{17}H_{13}N_5O$        |
| 184 | C301-1537 | 006 | A11 | <br>$C_{10}H_5N_7O_2$         |
| 185 | C301-2480 | 006 | C11 | <br>$C_{17}H_{20}ClN_5O_2$    |
| 186 | C301-3918 | 006 | F11 | <br>$C_{11}H_8N_6$           |
| 187 | C301-4549 | 006 | H11 | <br>$C_{17}H_{21}N_5O_3S$   |
| 188 | C301-5920 | 007 | B02 | <br>$C_{17}H_{13}N_5O_2$    |
| 189 | C430-0847 | 007 | C04 | <br>$C_6H_8N_6$             |
| 190 | E973-0287 | 008 | D05 | <br>$C_{20}H_{21}N_5O_3$    |
| 191 | 5629-0533 | 003 | D11 | <br>$C_{10}H_7N_3OS_2$      |
| 192 | 6672-0306 | 005 | A08 | <br>$C_{23}H_{25}N_3O_3S$   |
| 193 | 7009-0121 | 005 | F09 | <br>$C_{16}H_{11}ClN_4S$    |
| 194 | 7009-0292 | 005 | G09 | <br>$C_{21}H_{20}N_4O_2S$   |
| 195 | 7009-0641 | 005 | H09 | <br>$C_{17}H_{13}ClN_4O_2S$ |

|     |           |     |     |                                                                                                                   |
|-----|-----------|-----|-----|-------------------------------------------------------------------------------------------------------------------|
| 196 | D221-0305 | 007 | G10 | 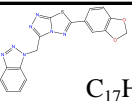<br><chem>C17H11N7O2S</chem>     |
| 197 | E157-4299 | 007 | F11 | <br><chem>C12H13N5O2S</chem>     |
| 198 | 1221-0128 | 001 | G04 | <br><chem>C14H12N4O2</chem>      |
| 199 | 1439-0154 | 001 | B06 | <br><chem>C13H7ClOS</chem>       |
| 200 | 3594-0962 | 002 | A04 | <br><chem>C18H15NO5S</chem>      |
| 201 | 3976-0239 | 002 | F06 | <br><chem>C19H15BrN2O3</chem>    |
| 202 | 5386-0664 | 003 | B08 | <br><chem>C10H4N8OS</chem>       |
| 203 | 5984-0169 | 004 | G05 | <br><chem>C13H7BrOS</chem>       |
| 204 | 6232-1901 | 005 | C04 | <br><chem>C16H12N2OS2</chem>     |
| 205 | 6253-0671 | 005 | G05 | <br><chem>C13H7BrOS</chem>      |
| 206 | C248-0004 | 006 | A10 | <br><chem>C12H9N5O3</chem>     |
| 207 | C248-0013 | 006 | B10 | <br><chem>C12H6F3N5O3</chem>   |
| 208 | E738-0349 | 008 | H03 | <br><chem>C26H20BrN3O3S</chem> |
| 209 | 1761-1901 | 001 | D09 | <br><chem>C15H12Br2N6O2</chem> |
| 210 | 1184-2227 | 001 | A04 | <br><chem>C13H11N5O4</chem>    |
| 211 | 1896-0163 | 001 | F09 | <br><chem>C16H14N6O4</chem>    |
| 212 | 1896-0218 | 001 | G09 | <br><chem>C15H13N5O4</chem>    |
| 213 | 2049-1807 | 001 | D10 | <br><chem>C14H8BrIN6O</chem>   |
| 214 | 4112-1260 | 002 | E07 | <br><chem>C10H8ClN5O</chem>    |

|     |           |     |     |                                                                                                                                                                   |
|-----|-----------|-----|-----|-------------------------------------------------------------------------------------------------------------------------------------------------------------------|
| 215 | 4112-1270 | 002 | F07 | <br>C <sub>11</sub> H <sub>13</sub> ClN <sub>4</sub> O                           |
| 216 | 5408-0474 | 003 | D08 | <br>C <sub>9</sub> H <sub>12</sub> N <sub>4</sub> O <sub>2</sub>                 |
| 217 | 4151-0396 | 002 | H07 | <br>C <sub>19</sub> H <sub>31</sub> N <sub>5</sub>                               |
| 218 | C163-0165 | 006 | B08 | <br>C <sub>16</sub> H <sub>17</sub> N <sub>5</sub> O <sub>3</sub> S              |
| 219 | C163-0512 | 006 | C08 | <br>C <sub>17</sub> H <sub>21</sub> N <sub>5</sub> O <sub>5</sub> S              |
| 220 | C226-4309 | 006 | H09 | <br>C <sub>17</sub> H <sub>18</sub> BrN <sub>5</sub> O <sub>3</sub> S            |
| 221 | C163-0149 | 006 | A08 | <br>C <sub>12</sub> H <sub>15</sub> N <sub>5</sub> O <sub>4</sub>                |
| 222 | C614-6004 | 007 | H06 | <br>C <sub>25</sub> H <sub>31</sub> N <sub>5</sub> O <sub>2</sub>                |
| 223 | D052-0023 | 007 | H09 | <br>C <sub>17</sub> H <sub>19</sub> ClN <sub>4</sub> O <sub>6</sub> S           |
| 224 | G262-0986 | 008 | B06 | <br>C <sub>12</sub> H <sub>17</sub> N <sub>5</sub> OS <sub>2</sub>             |
| 225 | K788-7062 | 008 | E10 | <br>C <sub>9</sub> H <sub>9</sub> NO <sub>3</sub> S                            |
| 226 | 5785-1359 | 004 | B03 | <br>C <sub>18</sub> H <sub>18</sub> FN <sub>3</sub> O <sub>2</sub>             |
| 227 | D047-0137 | 007 | F09 | <br>C <sub>17</sub> H <sub>23</sub> F <sub>2</sub> N <sub>3</sub> O            |
| 228 | C226-2735 | 006 | E09 | <br>C <sub>16</sub> H <sub>17</sub> N <sub>3</sub> O <sub>3</sub> S            |
| 229 | C226-2884 | 006 | F09 | <br>C <sub>10</sub> H <sub>16</sub> N <sub>2</sub> O <sub>2</sub>              |
| 230 | C226-3516 | 006 | G09 | <br>C <sub>20</sub> H <sub>24</sub> N <sub>2</sub> O <sub>6</sub> S            |
| 231 | C623-1201 | 007 | D07 | <br>C <sub>16</sub> H <sub>16</sub> N <sub>3</sub> O <sub>2</sub> <sup>+</sup> |

|     |           |     |     |                                                                                                                                                                                  |
|-----|-----------|-----|-----|----------------------------------------------------------------------------------------------------------------------------------------------------------------------------------|
| 232 | C623-2720 | 007 | E07 | 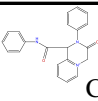<br>C <sub>21</sub> H <sub>18</sub> N <sub>3</sub> O <sub>2</sub> <sup>+</sup>                  |
| 233 | C623-2739 | 007 | F07 | <br>C <sub>21</sub> H <sub>17</sub> BrN <sub>3</sub> O <sub>2</sub> <sup>+</sup>                |
| 234 | G008-2661 | 008 | E05 | <br>C <sub>19</sub> H <sub>22</sub> N <sub>2</sub> O <sub>4</sub> S                             |
| 235 | G008-2935 | 008 | F05 | <br>C <sub>18</sub> H <sub>15</sub> F <sub>3</sub> N <sub>4</sub> O <sub>5</sub> S <sub>2</sub> |
| 236 | G008-2980 | 008 | G05 | <br>C <sub>14</sub> H <sub>18</sub> F <sub>3</sub> N <sub>3</sub> O <sub>3</sub> S <sub>2</sub> |
| 237 | G008-3184 | 008 | H05 | <br>C <sub>15</sub> H <sub>13</sub> F <sub>3</sub> N <sub>2</sub> O <sub>3</sub> S <sub>3</sub> |
| 238 | E692-1229 | 008 | F03 | <br>C <sub>19</sub> H <sub>25</sub> BrFN <sub>3</sub> O <sub>5</sub> S                          |
| 239 | 1431-0028 | 001 | A06 | <br>C <sub>12</sub> H <sub>7</sub> Br <sub>2</sub> NO <sub>3</sub> S                            |
| 240 | 2704-0001 | 002 | F02 | <br>C <sub>12</sub> H <sub>8</sub> Cl <sub>3</sub> NO <sub>3</sub> S                           |
| 241 | 3993-4586 | 002 | H06 | <br>C <sub>13</sub> H <sub>10</sub> ClNO <sub>3</sub> S                                       |
| 242 | 5591-2040 | 003 | F10 | <br>C <sub>10</sub> H <sub>8</sub> BrNO <sub>3</sub> S <sub>2</sub>                           |
| 243 | 7202-3000 | 006 | C03 | <br>C <sub>13</sub> H <sub>9</sub> NO <sub>5</sub> S                                          |
| 244 | D050-0092 | 007 | G09 | <br>C <sub>18</sub> H <sub>16</sub> BrN <sub>3</sub> O <sub>4</sub> S                         |
| 245 | E570-0060 | 008 | E02 | <br>C <sub>17</sub> H <sub>25</sub> N <sub>3</sub> O <sub>3</sub> S                           |
| 246 | 4905-1372 | 003 | D03 | <br>C <sub>10</sub> H <sub>11</sub> N <sub>3</sub> O <sub>4</sub> S                           |
| 247 | C176-0245 | 006 | E08 | <br>C <sub>16</sub> H <sub>15</sub> NO <sub>3</sub> S <sub>3</sub>                            |
| 248 | D047-0101 | 007 | E09 | <br>C <sub>16</sub> H <sub>24</sub> N <sub>2</sub> O <sub>2</sub> S                           |
| 249 | G240-0493 | 008 | A06 | <br>C <sub>23</sub> H <sub>26</sub> N <sub>2</sub> O <sub>5</sub> S                           |
| 250 | K261-2549 | 008 | C08 | <br>C <sub>10</sub> H <sub>12</sub> N <sub>2</sub> O <sub>2</sub> S <sub>2</sub>              |

|     |           |     |     |                                                                                                                 |
|-----|-----------|-----|-----|-----------------------------------------------------------------------------------------------------------------|
| 251 | E245-0279 | 007 | G11 | <br><chem>C17H22N2O4S</chem>   |
| 252 | 5293-0041 | 003 | B07 | <br><chem>C11H9N3O4S</chem>    |
| 253 | E511-1061 | 007 | H11 | <br><chem>C17H15FN2O4S2</chem> |
| 254 | 6937-0081 | 005 | E08 | <br><chem>C19H29N3O4S</chem>   |
| 255 | E565-0447 | 008 | D02 | <br><chem>C20H21N5O3S2</chem>  |
| 256 | E596-0108 | 008 | F02 | <br><chem>C22H30N6O2S</chem>   |
| 257 | C785-0977 | 007 | F08 | <br><chem>C20H26N4O2S</chem>   |
| 258 | 1636-0309 | 001 | H07 | <br><chem>C14H11BrN2S</chem>   |
| 259 | 1726-0132 | 001 | A09 | <br><chem>C15H17NOS2</chem>   |
| 260 | 1726-0133 | 001 | B09 | <br><chem>C12H11NOS2</chem>  |
| 261 | 4782-0199 | 002 | B11 | <br><chem>C21H28N2O2</chem>  |
| 262 | 5599-0684 | 003 | B11 | <br><chem>C21H26NO+</chem>   |
| 263 | 5324-0025 | 003 | E07 | <br><chem>C19H24NOS+</chem>  |
| 264 | 5008-0192 | 003 | B04 | <br><chem>C18H15OS+</chem>   |
| 265 | 7954-5044 | 006 | C06 | <br><chem>C19H18N2O7</chem>  |
| 266 | E002-1461 | 007 | E11 | <br><chem>C24H31N3OS</chem>  |
| 267 | E635-0288 | 008 | C03 | <br><chem>C27H34N4O3S</chem> |
| 268 |           | 001 | D11 | <br><chem>C20H12N2O4S</chem> |
| 269 | 3643-1400 | 002 | G04 | <br><chem>C10H5Cl2NO2</chem> |

|     |           |     |     |                                                                                                                 |
|-----|-----------|-----|-----|-----------------------------------------------------------------------------------------------------------------|
| 270 | 3584-0059 | 002 | G03 | <br><chem>C11H7Cl2NO2S2</chem> |
| 271 | 3977-1344 | 002 | G06 | <br><chem>C17H16N2O6S</chem>   |
| 272 | C151-0296 | 006 | H07 | <br><chem>C18H20N2O</chem>     |
| 273 | 5218-3347 | 003 | G05 | <br><chem>C10H13N3O2S</chem>   |
| 274 | 5371-4617 | 003 | A08 | <br><chem>C14H13N5O2S</chem>   |
| 275 | E547-0133 | 008 | C02 | <br><chem>C14H13N5OS3</chem>   |
| 276 | 6850-0232 | 005 | D08 | <br><chem>C21H19N5OS3</chem>   |
| 277 | 5144-0082 | 003 | B05 | <br><chem>C15H19N3O2S</chem>   |
| 278 | 5510-0886 | 003 | B09 | <br><chem>C15H17N3O2S</chem>   |
| 279 | 1689-0147 | 001 | C08 | <br><chem>C10H20N3O2+</chem>   |
| 280 | 2158-0062 | 001 | C11 | <br><chem>C15H20NO+</chem>    |
| 281 | 3788-1509 | 002 | H05 | <br><chem>C15H21N3OS</chem>  |
| 282 | 3843-0342 | 002 | A06 | <br><chem>C11H22N3O3+</chem> |
| 283 | 5320-4478 | 003 | D07 | <br><chem>C13H22N+</chem>    |
| 284 | 5504-0086 | 003 | E08 | <br><chem>C12H20N+</chem>    |
| 285 | 5830-1466 | 004 | F03 | <br><chem>C13H26N+</chem>    |
| 286 | 6228-0352 | 004 | F11 | <br><chem>C18H36NO2+</chem>  |
| 287 | 6228-0489 | 005 | B02 | <br><chem>C13H20NO3+</chem>  |
| 288 |           | 004 | G11 | <br><chem>C24H34NO2+</chem>  |
| 289 | 7150-0154 | 005 | B10 | <br><chem>C13H22NO+</chem>   |
| 290 | 7150-0157 | 005 | C10 | <br><chem>C14H26NO2+</chem>  |



|     |           |     |     |                                                                                                              |
|-----|-----------|-----|-----|--------------------------------------------------------------------------------------------------------------|
| 291 | 7405-3436 | 006 | B04 |  $C_{12}H_{24}NO^+$         |
| 292 | 3130-0766 | 002 | H02 |  $C_8H_{10}ClN_3O$          |
| 293 | 5554-0068 | 003 | D09 |  $C_{17}H_{32}NO^+$         |
| 294 | 6228-0529 | 005 | C02 |  $C_{13}H_{24}NO^+$         |
| 295 | 3886-1222 | 002 | D06 |  $C_9H_{18}NO^+$            |
| 296 | 6080-0058 | 004 | F09 |  $C_{13}H_{20}N^+$          |
| 297 | 6080-0081 | 004 | G09 |  $C_{17}H_{20}NO^+$         |
| 298 | D019-1004 | 007 | C09 |  $C_{18}H_{18}N_4S$         |
| 299 | D019-1188 | 007 | D09 |  $C_{19}H_{22}N_4O_4S$      |
| 300 | C087-1385 | 006 | F06 |  $C_{19}H_{24}ClN_3S_2$     |
| 301 | K788-6323 | 008 | D10 |  $C_{18}H_{26}ClN_3OS$     |
| 302 | C499-0070 | 007 | D05 |  $C_{21}H_{25}N_3OS$      |
| 303 | C499-0691 | 007 | E05 |  $C_{20}H_{22}N_4O_3S$    |
| 304 | C499-0753 | 007 | F05 |  $C_{18}H_{21}N_3O_4S$    |
| 305 | C499-1005 | 007 | G05 |  $C_{22}H_{19}N_3O_3S$    |
| 306 | C499-1006 | 007 | H05 |  $C_{24}H_{25}N_3OS$      |
| 307 | C202-0324 | 006 | D09 |  $C_{22}H_{28}BrN_5O_2$   |
| 308 | K832-4321 | 008 | H10 |  $C_{15}H_{10}BrF_2N_5OS$ |
| 309 | C301-2064 | 006 | B11 |  $C_{17}H_{16}N_6$        |
| 310 | C850-0735 | 007 | H08 |  $C_{13}H_{16}N_6O$       |

|     |           |     |     |                                                                                                                                                        |
|-----|-----------|-----|-----|--------------------------------------------------------------------------------------------------------------------------------------------------------|
| 311 | 3620-0916 | 002 | E04 | 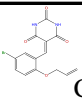<br>C <sub>14</sub> H <sub>11</sub> BrN <sub>2</sub> O <sub>4</sub>   |
| 312 | C370-0445 | 007 | D03 | <br>C <sub>15</sub> H <sub>9</sub> ClN <sub>4</sub> O <sub>5</sub>    |
| 313 | 1187-0105 | 001 | C04 | <br>C <sub>8</sub> H <sub>10</sub> N <sub>4</sub> O <sub>4</sub>      |
| 314 | 1530-0255 | 001 | A07 | <br>C <sub>5</sub> H <sub>8</sub> N <sub>4</sub> S                    |
| 315 | C285-0141 | 006 | F10 | <br>C <sub>6</sub> H <sub>7</sub> ClN <sub>4</sub> O <sub>2</sub>     |
| 316 | 1512-0210 | 001 | H06 | <br>C <sub>12</sub> H <sub>13</sub> N <sub>2</sub> O+                 |
| 317 | 3620-0875 | 002 | D04 | <br>C <sub>15</sub> H <sub>15</sub> BrN <sub>2</sub> O <sub>3</sub> S |
| 318 | 5074-0064 | 003 | F04 | <br>C <sub>12</sub> H <sub>13</sub> ClN <sub>2</sub> O <sub>2</sub>   |
| 319 | 5556-0108 | 003 | E09 | <br>C <sub>9</sub> H <sub>14</sub> Cl <sub>2</sub> N <sub>3</sub> O+  |
| 320 | C250-0299 | 006 | C10 | <br>C <sub>16</sub> H <sub>20</sub> N <sub>2</sub> S                  |
| 321 | 1238-0035 | 001 | H04 | <br>C <sub>10</sub> H <sub>21</sub> N <sub>2</sub> O <sub>2</sub> +  |
| 322 | 1623-0064 | 001 | F07 | <br>C <sub>14</sub> H <sub>18</sub> N <sub>2</sub> O <sub>9</sub>   |
| 323 | 1735-0003 | 001 | C09 | <br>C <sub>8</sub> H <sub>16</sub> NO <sub>2</sub> +                |
| 324 | 3331-3468 | 002 | C03 | <br>C <sub>10</sub> H <sub>8</sub> OS                               |
| 325 | 4596-0306 | 002 | G09 | <br>C <sub>4</sub> H <sub>3</sub> ClN <sub>4</sub> S                |
| 326 | 3642-0014 | 002 | F04 | <br>C <sub>19</sub> H <sub>28</sub> O <sub>7</sub>                  |
| 327 | 4782-0167 | 002 | A11 | <br>C <sub>11</sub> H <sub>22</sub> N <sub>2</sub> O <sub>3</sub>   |
| 328 | 5008-0267 | 003 | C04 | <br>C <sub>14</sub> H <sub>20</sub> O <sub>2</sub>                  |
| 329 | 5212-3112 | 003 | E05 | <br>C <sub>17</sub> H <sub>32</sub> NO <sub>2</sub> +               |
| 330 | 5556-0461 | 003 | G09 | <br>C <sub>10</sub> H <sub>22</sub> N <sub>3</sub> O <sub>2</sub> + |
| 331 | 5689-0003 | 003 | G11 | <br>C <sub>15</sub> H <sub>21</sub> NO                              |
| 332 | 5701-2415 | 004 | A02 | <br>C <sub>13</sub> H <sub>19</sub> N <sub>3</sub> S                |

|     |                                               |     |     |                                                                                                                |
|-----|-----------------------------------------------|-----|-----|----------------------------------------------------------------------------------------------------------------|
| 333 | 5794-0740                                     | 004 | D03 | <br><chem>C11H15ClN2O2</chem> |
| 334 | 6623-0260                                     | 005 | G07 | <br><chem>C11H15NO2</chem>    |
| 335 | 7513-0010                                     | 006 | C04 | <br><chem>C13H20N2O3</chem>   |
| 336 | C301-0348                                     | 006 | G10 | <br><chem>C19H20ClNO2S</chem> |
| 337 | C301-3970                                     | 006 | G11 | <br><chem>C8H7ClN4</chem>     |
| 338 | C761-1499                                     | 007 | E08 | <br><chem>C20H27NO3S</chem>   |
| 339 | D183-0127                                     | 007 | D10 | <br><chem>C13H17N7O4</chem>   |
| 340 | K780-0404                                     | 008 | E09 | <br><chem>C11H10ClNO2</chem>  |
| 341 | K783-3185                                     | 008 | G09 | <br><chem>C9H15Cl3N2O3</chem> |
| 342 | N089-0202                                     | 008 | C11 | <br><chem>C13H21F3NO2+</chem> |
| 343 | 2,3,5,6-tetrachlorobenzo-1,4-quinone<br>T4271 | 008 | E11 | <br><chem>C6Cl4O2</chem>     |
| 344 | 1,1-Cyclopentane diacetic acid                | 008 | G11 | <br><chem>C9H14O4</chem>    |

**Supplemental Table 4.** 52 small molecules with no similarities to NAD and known PARP-1 inhibitors. This table contains small molecules located in cells I1, I2, J1, and J2 of the 2D matrix shown on **Figure 2BC**. Column # 1 indicates position in 2D matrix, column # 2 lists the ID number of each small molecule according to the ChemDiv company catalogue, column # 3 - the plate number; column # 4 – position on the plate; column # 5 - formulas in SMILES format; column # 6 – skeletal structure.

|    | 1  | 2         | 3   | 4   | 5                                                                          | 6                                                                                    |
|----|----|-----------|-----|-----|----------------------------------------------------------------------------|--------------------------------------------------------------------------------------|
| 1  | i1 | 3601-0852 | 002 | B04 | <chem>CC(C)n(c(n1)S)c(c12)c(=O)n(C)c(=O)n2C</chem>                         | 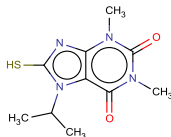   |
| 2  | i1 | 4596-0306 | 002 | G09 | <chem>N#Cc1c(NN)snc1Cl</chem>                                              |    |
| 3  | i1 | 5508-0335 | 003 | F08 | <chem>n1nc(S)n2c1c(c3n(c24)c(S)nn4)c5c(s3)CC(C)CC5</chem>                  |    |
| 4  | i1 | 5586-4259 | 003 | C10 | <chem>n1nc(S)n(c12)c3c(c(C)c(s3)C)c4n2c(nn4)S</chem>                       |    |
| 5  | i1 | 5720-0252 | 004 | B02 | <chem>n1nc(S)n(N)c1-n2nccc2</chem>                                         |   |
| 6  | i1 | 6085-0126 | 004 | H09 | <chem>C1CCCN1c2nc(SCCCC)c(C#N)c(c23)CC(C)(C)OC3</chem>                     |  |
| 7  | i1 | 7286-2215 | 006 | F03 | <chem>n1nc(N)sc1-c2c(N)non2</chem>                                         |  |
| 8  | i2 | 6944-0119 | 005 | C09 | <chem>COc1c(OC)cc(CC[N+](C)(C)C2C3)c2c1C34C=CC(=O)C=C4</chem>              |  |
| 9  | i2 | C761-1499 | 007 | E08 | <chem>C1CCCCC1CC(=O)N(C(C2)C=CS2(=O)=O)c(c3)cc(C)cc3C</chem>               |  |
| 10 | i2 | D052-0023 | 007 | H09 | <chem>Cc1c(Cl)c(C)n(n1)CC(=O)NC2C(=O)N(C23)C(C(=O)O)=C(CS3)COC(=O)C</chem> |  |

|    |    |           |     |     |                                                                     |  |
|----|----|-----------|-----|-----|---------------------------------------------------------------------|--|
| 11 | i2 | 4782-0167 | 002 | A11 | <chem>CCOC(=O)/C(=N/O)CCC[N+](C)(CC)CC</chem>                       |  |
| 12 | i2 | 6115-0248 | 004 | B10 | <chem>O=C(O)CCC(=O)Nc(s1)nnc1CC</chem>                              |  |
| 13 | i2 | C482-0405 | 007 | H04 | <chem>o1c(Br)ccc1/C=C(C(N2)=O)/C(=N/[H])N(C=C23)OC(C)=C3</chem>     |  |
| 14 | i2 | C226-4309 | 006 | H09 | <chem>C1CCCc(c12)sc(c2C#N)NC(=O)CCCn3nc([N+][O-])=O)c(Br)c3C</chem> |  |
| 15 | i2 | K783-3185 | 008 | G09 | <chem>CCOC(=O)NC(C(Cl)(Cl)Cl)N1CCOCC1</chem>                        |  |
| 16 | i2 | 4142-0922 | 002 | G07 | <chem>C1CCCCN1CCCN(C2=O)C(=O)C(C23)CC=C(Cl)C3</chem>                |  |
| 17 | j1 | 5212-3112 | 003 | E05 | <chem>CC[N+](C)(CC)CC(=O)OCC(C(C)C1)C(C)C=C1C</chem>                |  |
| 18 | j1 | 6228-1189 | 005 | H03 | <chem>CCOC(=O)CC1(C)OC(CO1)C[N+](2)C)CCCC2</chem>                   |  |
| 19 | j1 | N089-0202 | 008 | C11 | <chem>FC(F)(F)C(=O)OCC(CCC1)C([N+](12C)CCCC2</chem>                 |  |
| 20 | j1 | 6228-0288 | 004 | D11 | <chem>CC(C)CC1C(CCCC1)OC(=O)C[N+](2)C)CCCC2</chem>                  |  |
| 21 | j1 | 6228-1187 | 005 | F03 | <chem>C1CCCC[N+](1)C)C(=O)OC(CC2)CC2C(C)(C)C</chem>                 |  |

|    |    |           |     |     |                                                                                             |  |
|----|----|-----------|-----|-----|---------------------------------------------------------------------------------------------|--|
| 22 | j1 | 6944-0056 | 005 | G08 | <chem>C1=CCN(CC2)C3C1(CC)[C@@H](OC(=O)C)[C@](O)(C(=O)OC)C4N(C)c(c5C234)cc(c(Br)c5)OC</chem> |  |
| 23 | j1 | 5933-0676 | 004 | D04 | <chem>O1CCCC1Cn(c(=S)[nH]n2)c2C34CC5C(C3)CC(C4)C5</chem>                                    |  |
| 24 | j1 | 1735-0003 | 001 | C09 | <chem>C[N+](C)(C)C/C=C1/COC1</chem>                                                         |  |
| 25 | j1 | 6228-0595 | 005 | E02 | <chem>C1CCCC[N+](C)CNC(=O)C(=O)C(C23)C4C=CC3C4</chem>                                       |  |
| 26 | j1 | 6228-0879 | 005 | D03 | <chem>C1CCC[N+](C)CC2COC(O2)C3CC=CC3</chem>                                                 |  |
| 27 | j1 | 5504-0086 | 003 | E08 | <chem>C=CC#CC[N+](CC)CCCC1</chem>                                                           |  |
| 28 | j1 | 5008-0267 | 003 | C04 | <chem>CC(C)(C)C1=CC(C(C)(C)C)=CC(=O)C1=O</chem>                                             |  |
| 29 | j1 | 5320-4478 | 003 | D07 | <chem>C=CC[C@H]([N+](C)C)C=CC[C@H]1CC=C</chem>                                              |  |
| 30 | j1 | 3886-1222 | 002 | D06 | <chem>C1C(O)CC([N+](2)C)C)CCC12</chem>                                                      |  |
| 31 | j1 | 7405-3436 | 006 | B04 | <chem>CCCC[N+](C)C(C)CC12)CC(C2)O</chem>                                                    |  |

|    |    |           |     |     |                                                      |  |
|----|----|-----------|-----|-----|------------------------------------------------------|--|
| 32 | j1 | 4030-0007 | 002 | A07 | <chem>C1CCCCN1Cn(c2= S)cnn2CN3CCCCC3</chem>          |  |
| 33 | j1 | 6228-0539 | 005 | D02 | <chem>C1CCC[N+]1(C)CC(CO2)OC23CCCC3</chem>           |  |
| 34 | j1 | 0         | 005 | G02 | <chem>C1CCC[N+]1(C)CC(CO2)OC23CCCCC3</chem>          |  |
| 35 | j1 | 6228-0683 | 005 | H02 | <chem>C1CCCC[N+]1(C)C(CO2)OC23CCCCC3</chem>          |  |
| 36 | j1 | 5212-2884 | 003 | D05 | <chem>C1COCC[N+]1(C)C(CO2)OC23CCCCC3</chem>          |  |
| 37 | j1 | 6228-0778 | 005 | C03 | <chem>CC(C)CC1(C)OC(CO1)C[N+]2(C)CCC(C)C2</chem>     |  |
| 38 | j1 | 6228-0712 | 005 | B03 | <chem>C1CCCC[N+]1(C)C(C(O2)OC(C)CC2(C))C</chem>      |  |
| 39 | j1 | 6228-0529 | 005 | C02 | <chem>C1CCC[N+]1(C)C2CCC(C(C23)O)CC3</chem>          |  |
| 40 | j1 | 5554-0068 | 003 | D09 | <chem>C1CCC[N+]1(C)CCOC2CC(CC3)[C@](C)(C)C23C</chem> |  |
| 41 | j1 | 7150-0154 | 005 | B10 | <chem>C=CC#CC1(O)C(C)C[N+](C)(C)C(C)C1</chem>        |  |
| 42 | j1 | 5830-1466 | 004 | F03 | <chem>C[C@H](C1)[C@H](C)CC12CCCC[N+]2(C)C</chem>     |  |



|    |    |           |     |     |                                                                   |                                                                                      |
|----|----|-----------|-----|-----|-------------------------------------------------------------------|--------------------------------------------------------------------------------------|
| 43 | j1 | 6228-0480 | 005 | A02 | <chem>C[N+](C)(C)CCCN(C1=O)C(=O)C(C12)CC3=C(C2)C(C)(C)CCC3</chem> | 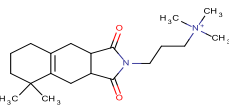   |
| 44 | j1 | 6228-1188 | 005 | G03 | <chem>C1CC(C2)C(C(C)(C)C)C12)CC(O3)OCC3CN4CCCCC4</chem>           |    |
| 45 | j1 | 7150-0157 | 005 | C10 | <chem>CC(C)(O)C#CC1(O)C(C)C[N+](C)(C)C(C)C1</chem>                |    |
| 46 | j2 | 6228-1073 | 005 | E03 | <chem>C1CCC[N+](C)CC(=O)OCCCO(=O)C[N+](C)CC2</chem>               |    |
| 47 | j2 | 6228-0352 | 004 | F11 | <chem>COC(=O)CCCCC(CCCC[N+](C)CCC)CC1</chem>                      |    |
| 48 | j2 | 6228-0650 | 005 | F02 | <chem>C1CCCC[N+](C)C(C(=O)OC2CCCC)CCCC2</chem>                    |   |
| 49 | j2 | 6521-0200 | 005 | B07 | <chem>[nH]1c(S)nnc1C(C)CC(C(=O)O2)CC2(C)C</chem>                  |  |
| 50 | j2 | 6228-0476 | 004 | H11 | <chem>C1COCC[N+](C)C(C(=O)OCC2CC)CCC2</chem>                      |  |
| 51 | j2 | 0KPI-0079 | 001 | C03 | <chem>[nH]1c(=S)[nH]c(c1C)C23CC4CC(C2)C(C3)C4</chem>              |  |
| 52 | j2 | 6228-0215 | 004 | B11 | <chem>C[N+](C)(C)CCCN(C1=O)C(=O)C(C12)CC(C)=CC2C</chem>           |  |
